# Supplementary material for: Fundamentals of green chemistry: efficiency in reaction design
Source: Royal Society of Chemistry journal article supplement (doi:10.1039/c1cs15219j), 2011-10-28
Supplement: c1cs15219j.pdf [file c1cs15219j.pdf]

# Fundamentals of Green Chemistry: Efficiency in Reaction Design

## A Tutorial Review

**Roger A. Sheldon**

**Department of Biotechnology**

**Delft University of Technology**

**[r.a.sheldon@tudelft.nl](mailto:r.a.sheldon@tudelft.nl)**

**[r.sheldon@clea.nl](mailto:r.sheldon@clea.nl)**

# Fundamentals of Green Chemistry: Efficiency in Reaction Design

## Outline

1. Introduction: Efficiency in Organic Synthesis
2. Alcohol Oxidation
3. Enantioselective Ketone Reduction
4. Biocatalysis
5. Enzyme Immobilization
6. Conclusions & Take Home Message

# Phloroglucinol Synthesis anno 1980

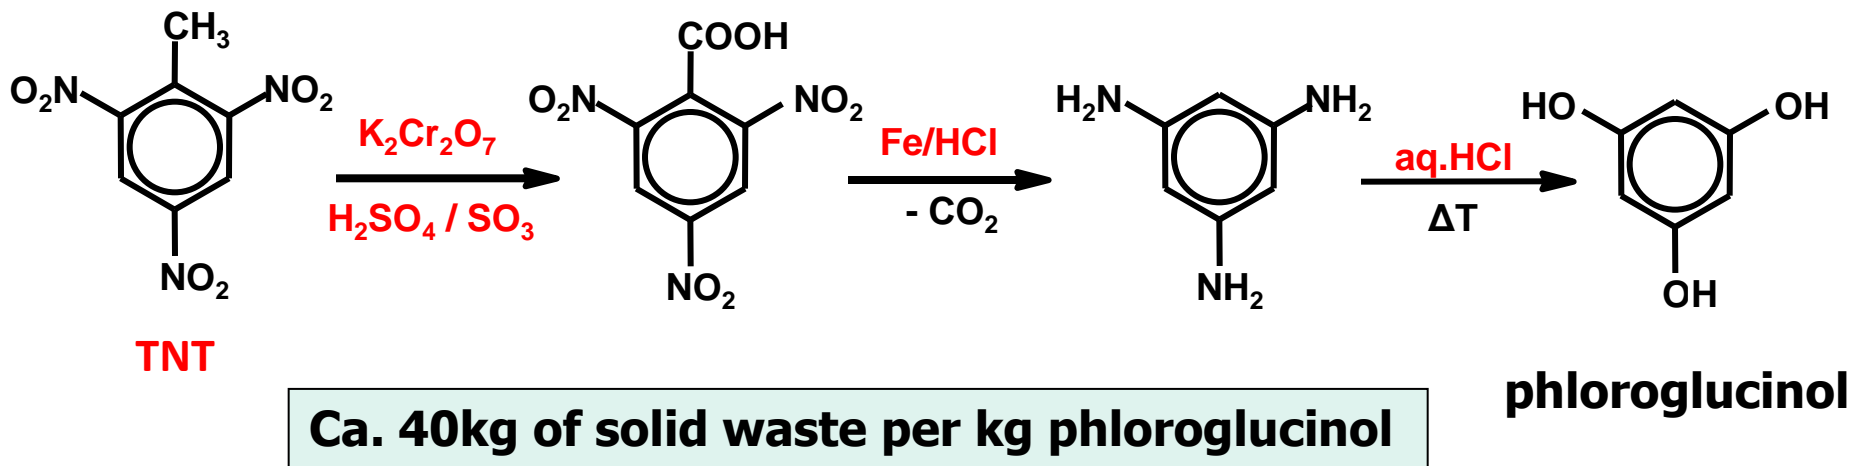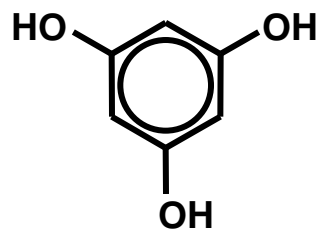

**product**

MW = 126

> 90 % yield  
Selective?  
Efficient?

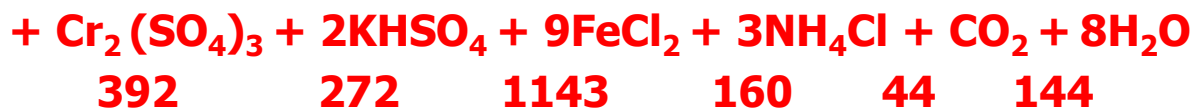

**byproducts**

**Atom Utilisation = 126/2282 = ca. 5 %**  
**E Factor = ca. 40**

**“ To measure is to know ” Lord Kelvin**

# Reaction Stoichiometry and Atom Economy

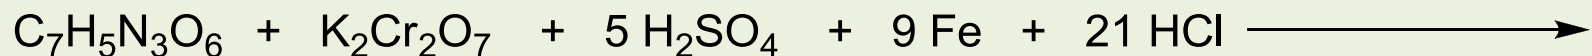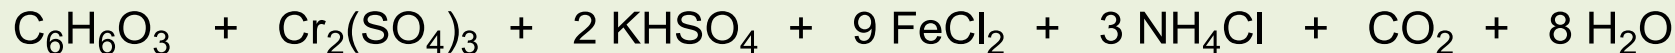

126

392

272

1143

161

44

144

Atom economy =  $126/2282 = \text{ca. } 5 \%$

# Conclusion?

**A new paradigm was needed for efficiency in organic synthesis.**

**From the traditional one of chemical yield  
to one that assigns value to waste elimination  
and avoiding toxic/hazardous materials.**

# Atom Economy of Ethylene Oxide Manufacture

## 1 Chlorohydrin process

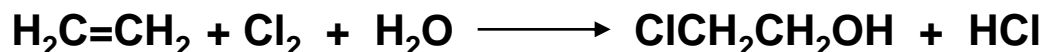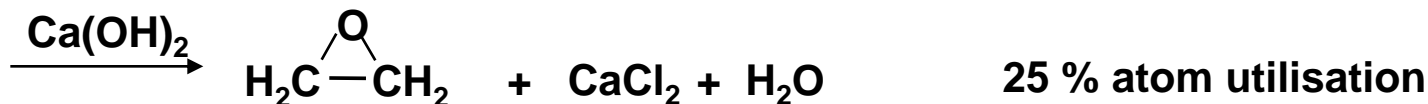

## 2. Direct Oxidation

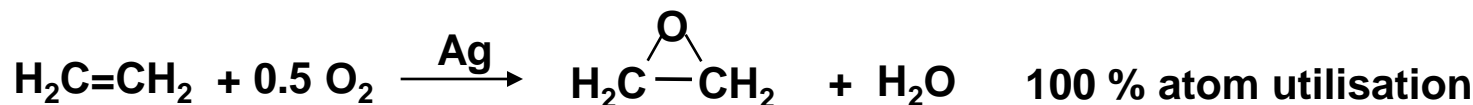

# **E Factor = kg waste/kg product**

|                         | Tonnage         | E Factor  |
|-------------------------|-----------------|-----------|
| Oil Refining            | $10^6$ - $10^8$ | <0.1      |
| Bulk Chemicals          | $10^4$ - $10^6$ | <1 - 5    |
| Fine chemical Industry  | $10^2$ - $10^4$ | 5 - >50   |
| Pharmaceutical Industry | $10$ - $10^3$   | 25 - >100 |

**“Another aspect of process development mentioned by all pharmaceutical process chemists who spoke with C&EN is the need for determining an **E Factor**”.**

**A. N. Thayer, C&EN, August 6, 2007, pp. 11-19**

**R.A.Sheldon, Chem & Ind, 1992, 903 ; 1997, 12**

# The E factor

## (E)verything but the Product

- **Is the actual amount of all waste formed in the process, including solvent losses and waste from energy production (c.f. atom utilisation is a theoretical nr.)**
- **$E = [\text{kgs raw materials} - \text{kgs product}] / [\text{kgs product}]$**
- **A good way to quickly show (e.g. to students) the enormity of the waste problem**

**What about the process water?**



# Sustainability

**Meeting the needs of the present generation without compromising the needs of future generations to meet their own needs**

Brundtland Report, 'Our Common Future', 1987

# The Great Law of the Iroquois Confederacy

'In our every deliberation, we must consider the impact of our decisions on the next seven generations.'

<http://www.iroquoisdemocracy.pdx.edu>

[www.seventhgeneration.com](http://www.seventhgeneration.com)

# The Twelve Principles of Green Chemistry

1. Prevention instead of Remediation
2. Atom Efficiency
3. Less Hazardous Chemicals
4. Design Safer Chemical Products
5. Safer Solvents & Auxiliaries
6. Energy Efficient by Design

P.T.Anastas & J.C.Warner, Green Chemistry : Theory  
& Practice ,Oxford Univ. Press, New York, 1998

# The Twelve Principles of Green Chemistry

7. Renewable Raw Materials
8. Shorter Syntheses
9. Catalytic Methodologies
10. Design for Degradation
11. Analysis for Pollution Prevention
12. Inherently Safer Chemistry

P.T.Anastas & J.C.Warner, Green Chemistry : Theory  
& Practice ,Oxford Univ. Press, New York, 1998

# A Mnemonic for the Spirit of Green Chemistry

- P** – Prevent wastes
- R** – Renewable materials
- O** – Omit derivatisation steps
- D** – Degradable chemical products
- U** – Use of safe synthetic methods
- C** – Catalytic reagents
- T** – Temperature, Pressure ambient
- I** – In-Process monitoring
- V** – Very few auxiliary substrates
- E** – E-factor, maximise feed in product
- L** – Low toxicity of chemical products
- Y** – Yes, it is safe

S. L. Y. Tang, R. L. Smith and M. Poliakoff, *Green Chem.*, **2005**, 7,761.

# Green (Clean) Chemistry

**Green chemistry efficiently utilises (preferably renewable) raw materials, eliminates waste and avoids the use of toxic and/or hazardous solvents and reagents in the manufacture and application of chemical products.**

**Anastas & Warner, Green Chemistry : Theory & Practice ,Oxford Univ. Press,New York,1998**

**Sheldon, Arends and Hanefeld , Green Chemistry and Catalysis, Wiley, New York, 2007**

# Metrics of Green Chemistry

## E factor

$$E = \frac{\text{Total mass of waste}}{\text{Mass of final product}}$$

## Atom efficiency (AE)

$$AE (\%) = \frac{\text{m.w of product} \times 100}{\Sigma \text{ m.w. of reactants}}$$

## Mass intensity (MI)

$$MI = \frac{\text{Total mass in process}}{\text{Mass of product}}$$

## Reaction mass efficiency (RME)

$$RME(\%) = \frac{\text{Mass of product C} \times 100}{\text{Mass of A} + \text{Mass of B}}$$

## Mass Productivity (MP)

$$MP = \frac{\text{Mass of product}}{\text{Total mass in process}}$$

## Carbon efficiency (CE)

$$CE(\%) = \frac{\text{Carbon in product} \times 100}{\text{Total carbon in reactants}}$$

## Effective mass yield (EMY)

$$EMY(\%) = \frac{\text{Mass of product} \times 100}{\text{Mass of hazardous reagents}}$$

# The Environmental Impact EQ

$$EQ = E(\text{kg waste}) \times Q$$

**Q = Unfriendliness Multiplier**

**e.g. NaCl : Q = 1 ( arbitrary)**

**Cr salts : Q = 1000?**

**There are many shades of green!**

**R.A.Sheldon, Chem & Ind, 1992, 903 ; 1997, 12**



# Major Sources of Waste

- **Stoichiometric Reagents**
  - Acids & Bases (e.g  $\text{H}_2\text{SO}_4$  and  $\text{NaOH}$ )
  - Oxidants & reductants (e.g.  $\text{K}_2\text{Cr}_2\text{O}_7$  &  $\text{Fe/HCl}$ )
- **Solvent losses ( 85% of non-aqueous mass)**
  - Air emissions & aqueous effluent
- **Multistep syntheses**

**The Solution :**

**Atom & step economic catalytic processes  
in alternative reaction media ( $\text{H}_2\text{O}$ ,  $\text{scCO}_2$ , ILs)  
(the best solvent is no solvent)**

**What about process water?**

**Only counts if it needs to be treated?**

# Atom Economy of Catalytic Processes

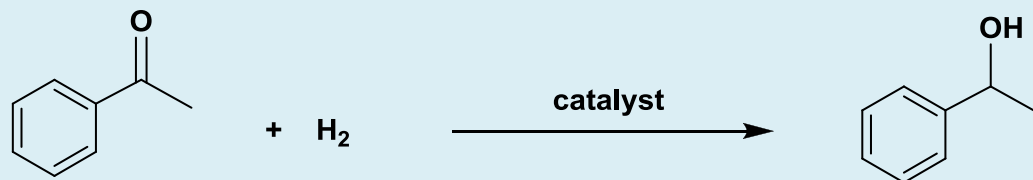

**AE = 100 %**

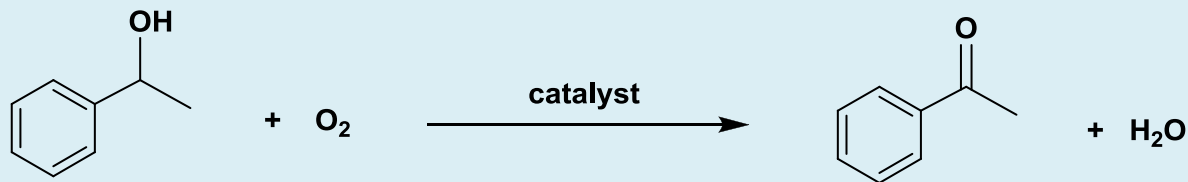

**AE = 87 %**

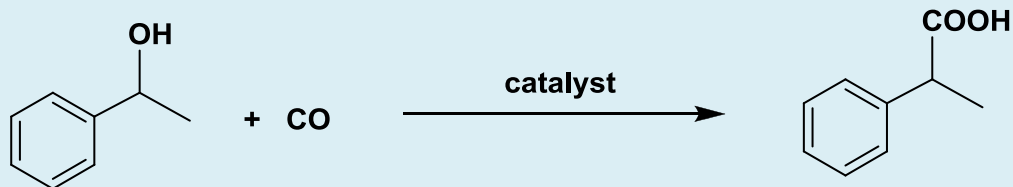

**AE = 100 %**

# The Ideal Synthesis

**100% Yield**

**One Step**

**Simple & Safe**

**Economical in Time & Waste**

**Environmentally Acceptable**

**- atom economy**

**- step economy**

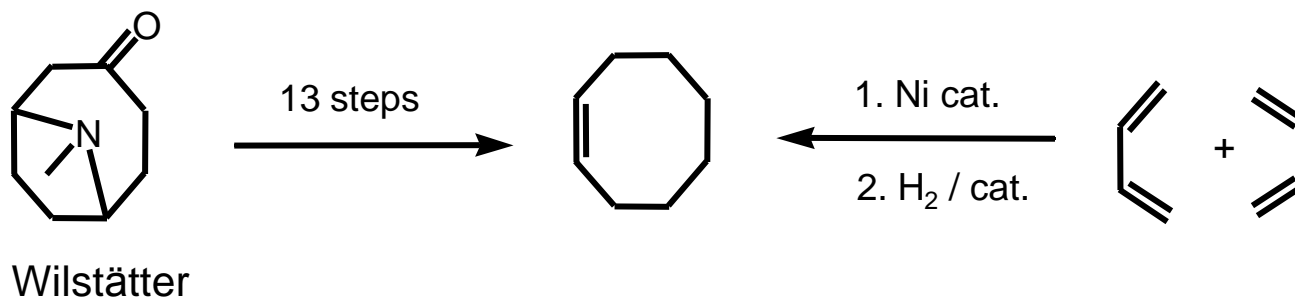

# The Ideal Process

"The ideal chemical process is that which a one-armed operator can perform by pouring the reactants into a bath tub and collecting pure product from the drain hole"

Sir John Cornforth (Nobel Prize 1975)

# Solvent Selection Guide

**Pentane**  
**Hexane(s)**  
**Di-isopropyl ether**  
**Diethyl ether**  
**Dichloromethane**  
**Dichloroethane**  
**Chloroform**  
**NMP**  
**DMF**  
**Pyridine**  
**DMAc**  
**Dioxane**  
**Dimethoxyethane**  
**Benzene**  
**Carbon Tetrachloride**

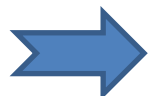

**Cyclohexane**  
**Toluene**  
**Methylcyclohexane**  
**TBME**  
**Isooctane**  
**Acetonitrile**  
**2-MeTHF**  
**THF**  
**Xylenes**  
**DMSO**  
**Acetic Acid**  
**Ethylene Glycol**

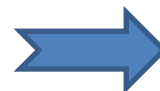

**Water**  
**Acetone**  
**Ethanol**  
**2-Propanol**  
**1-Propanol**  
**Heptane**  
**Ethyl Acetate**  
**Isopropyl acetate**  
**Methanol**  
**MEK**  
**1-Butanol**  
***t*-Butanol**

# New Sertraline Process (Pfizer's Antidepressant) is Greener

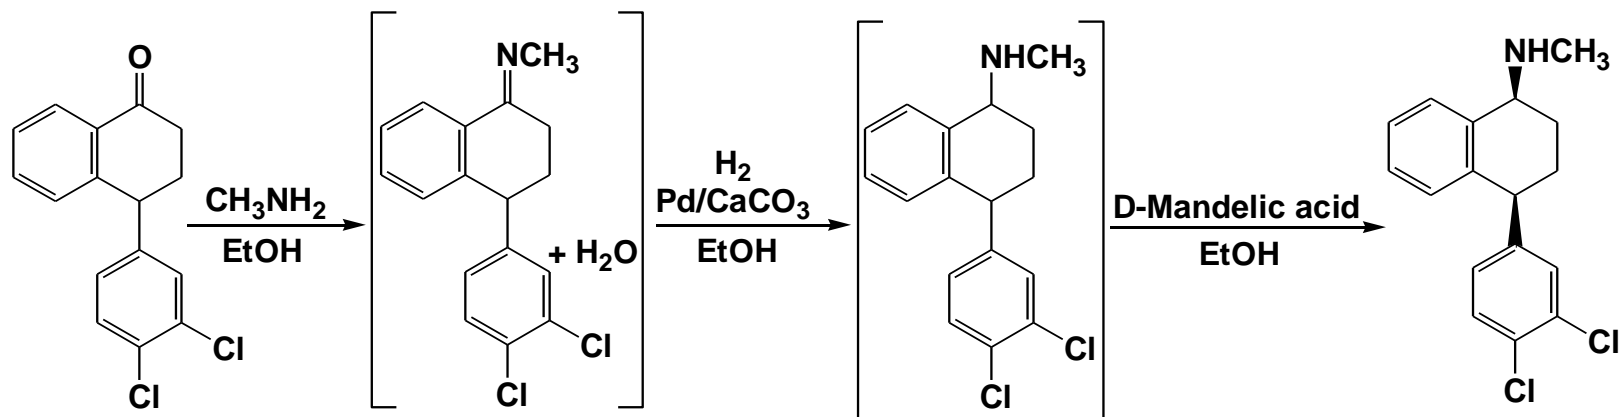

Three step process

Introduction of EtOH as solvent

Replacement of Pd/C with Pd/CaCO<sub>3</sub> - higher yields

Elimination of titanium chloride, toluene, THF, CH<sub>2</sub>Cl<sub>2</sub>, and hexane

Reduction of solvents from 60,000 to 6,000 gal/ton

Elimination of 440 tons of titanium dioxide, 150 tons of 35% HCl, and 100 tons of 50% NaOH

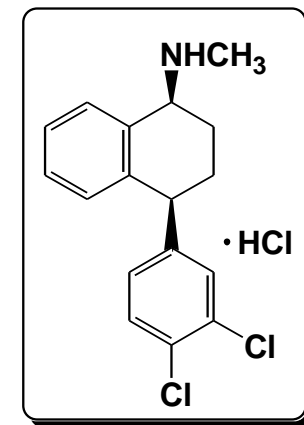

Sertraline  $\cdot$   $\text{HCl}$

# Catalysis & Green Chemistry

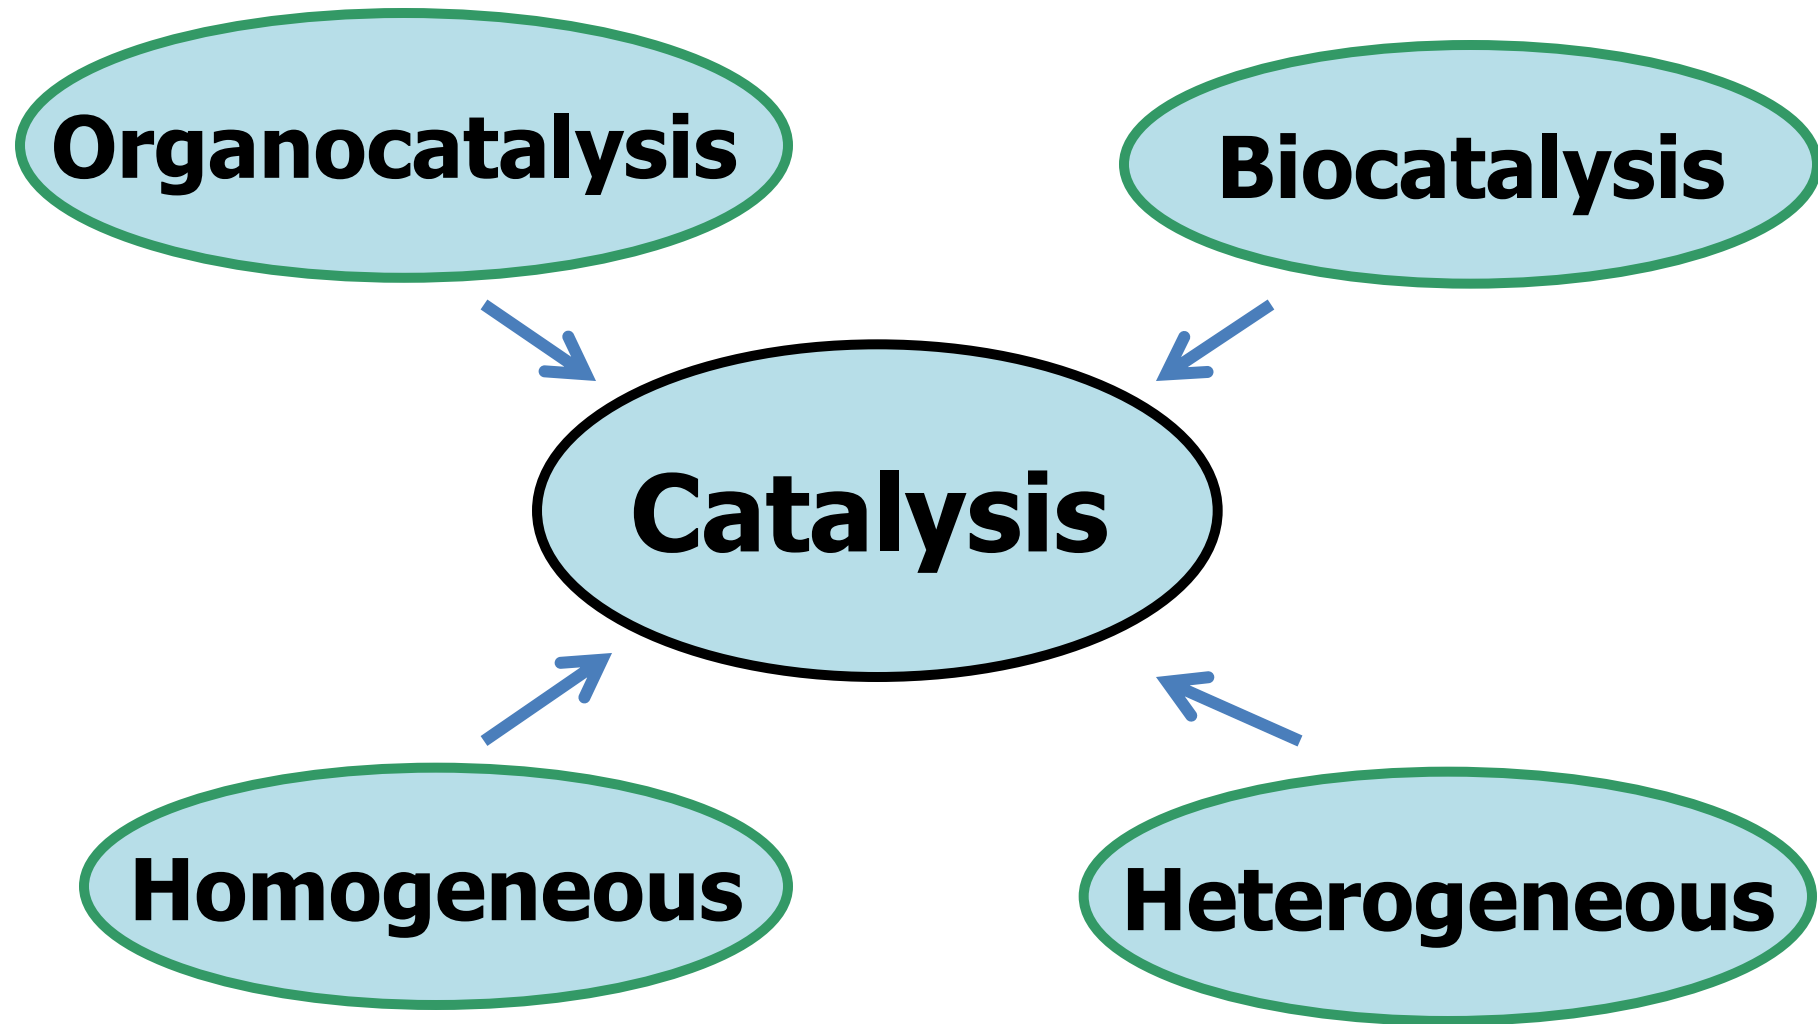

**Sheldon, Arends and Hanefeld , Green Chemistry  
And Catalysis, Wiley, New York, 2007**

# Organic chemistry & Catalysis: Bridging the Gap

J. J. Berzelius 1779-1848

## Organic Chemistry (1807)

Urea synthesis      1828  
( Wöhler )

First synthetic dye      1856  
Aniline purple  
(Perkin)

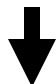

Dyestuffs Industry  
(based on coal-tar)

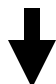

Fine Chemicals

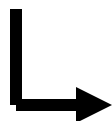

## Catalysis (1835)

ca. 1900    Catalysis definition  
                  (Ostwald)  
                  Catalytic Hydrogenation  
                  (Sabatier)

ca. 1920    Petrochemicals

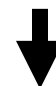

1936    Catalytic cracking  
1949    Catalytic reforming  
1955    Ziegler-Natta catalysis

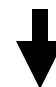

Bulk Chemicals & Polymers

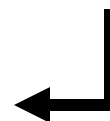

Catalysis in Organic Synthesis



# Pivotal Reactions in Organic Synthesis

## Oxidation

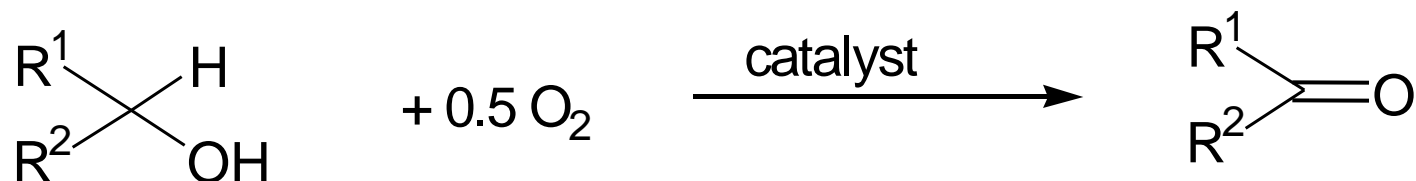

## Reduction

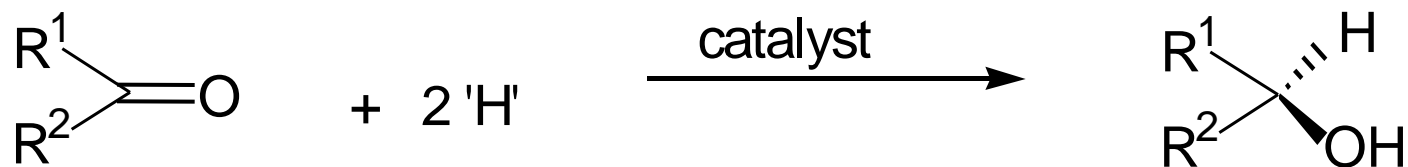

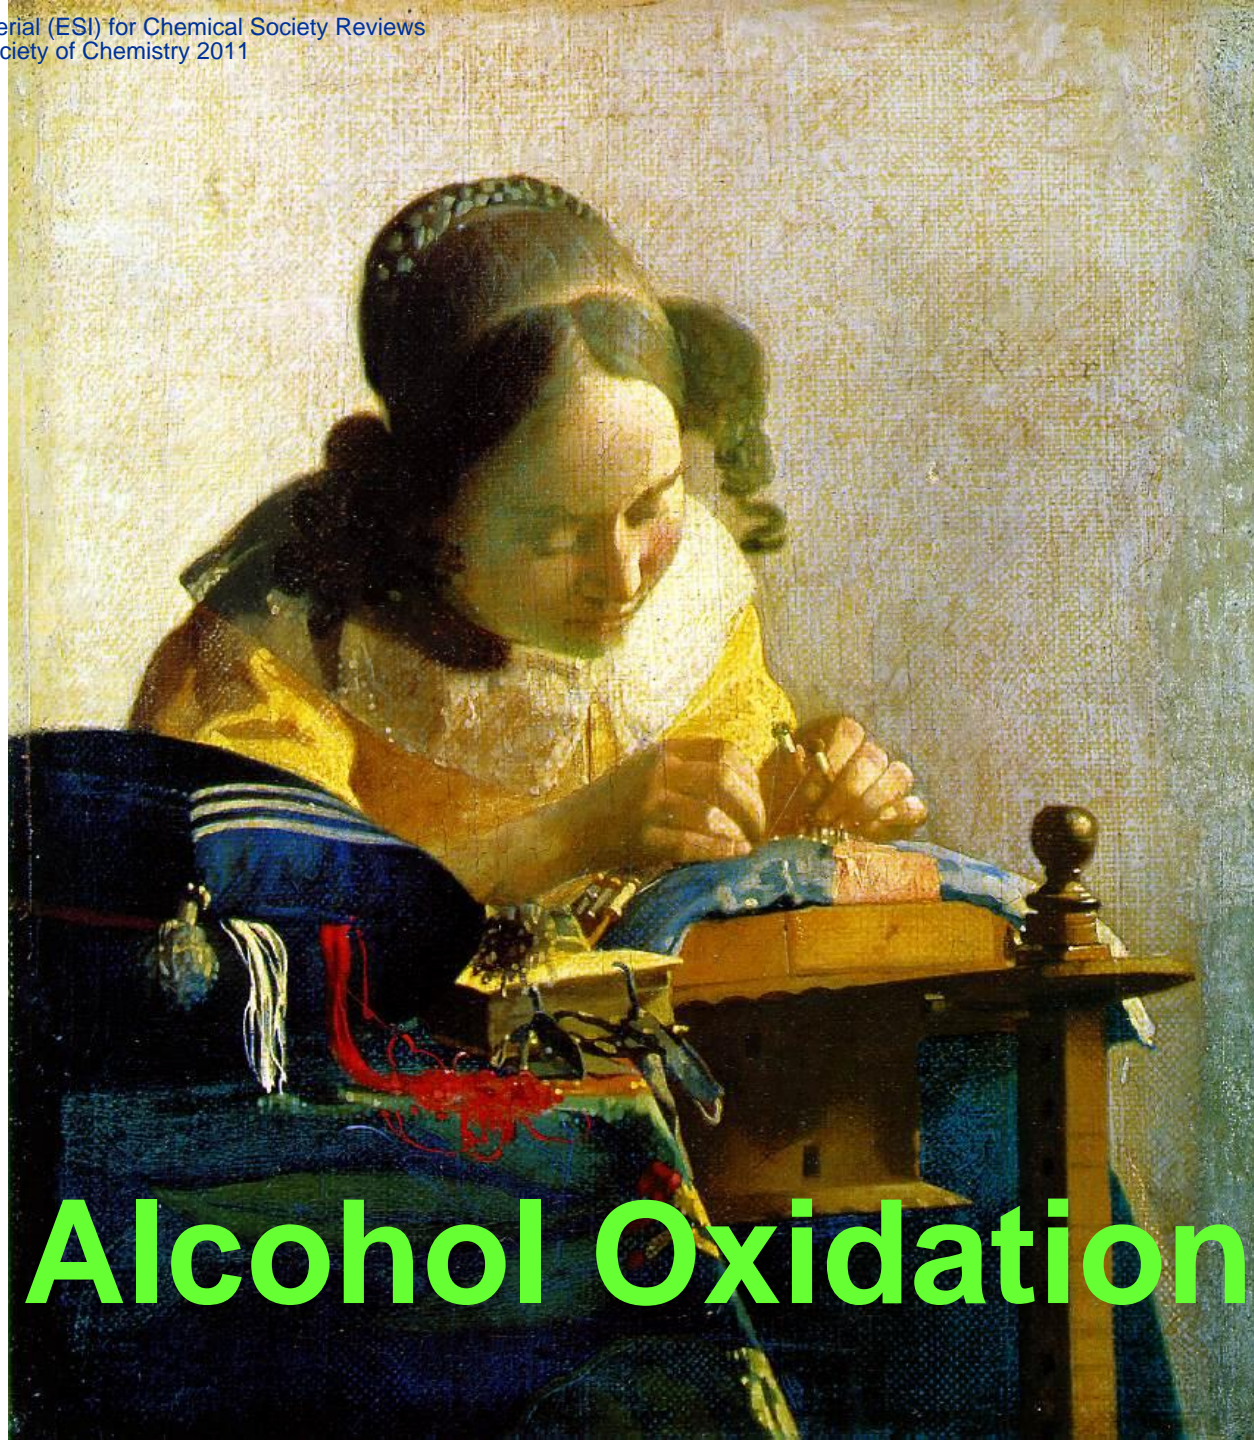

# Alcohol Oxidation

# Classical Alcohol Oxidations

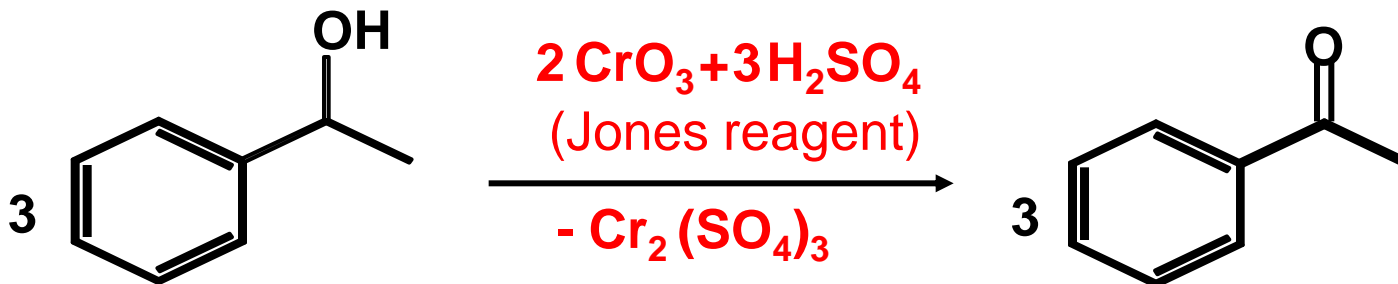

“It’s hexavalent chromium, highly toxic, highly carcinogenic. Gets into your DNA, so you pass the trouble along to your kids.”

Julia Roberts in ‘Erin Brokovich’

**Atom Utilisation = 44%**  
**E = > 3**

## Other reagents favoured by organic chemists

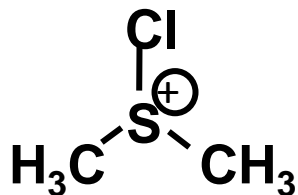

Swern

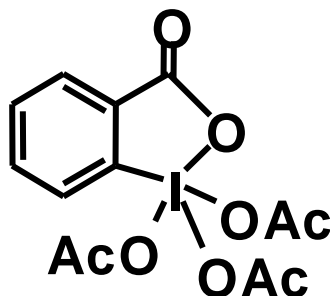

Dess-Martin

- Poor atom economy
- Hazardous reagents

# Venn and the Art of Green Chemistry

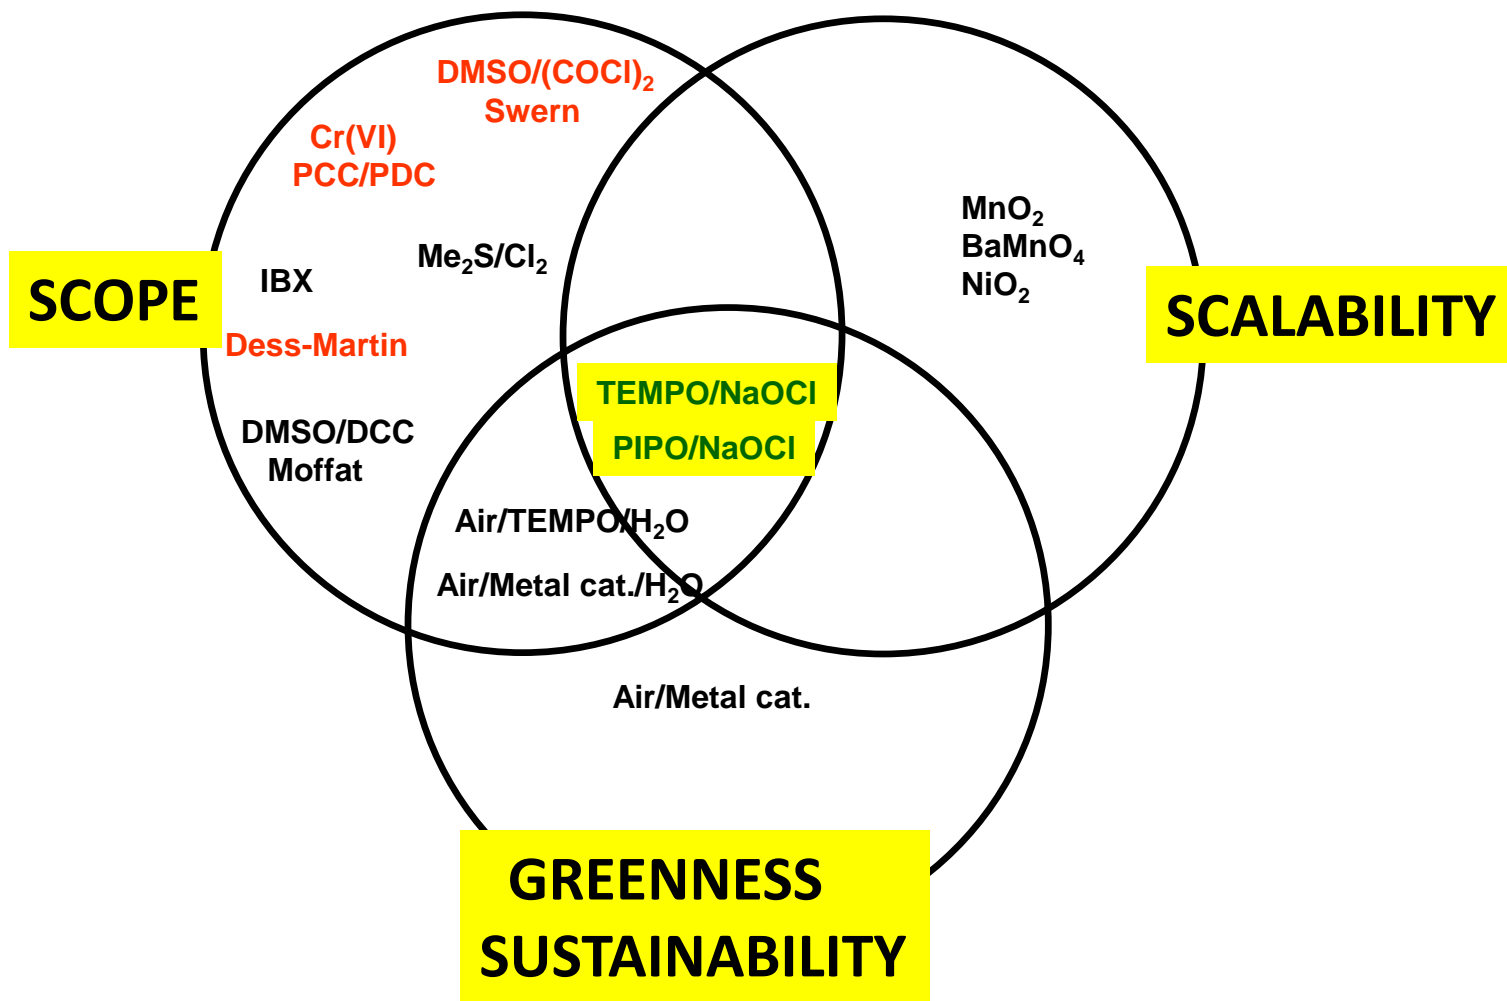

## Oxidation of Primary Alcohol to Aldehyde

# Catalytic Oxidations in Water

## Water

- **Polar, inert and clean solvent**
- **Facile product separation**
- **Cheap and widely available**
- **Non-flammable and non-toxic**
- **Odourless and colourless**

**Recycling of catalyst**

# Green, Catalytic Alcohol Oxidations

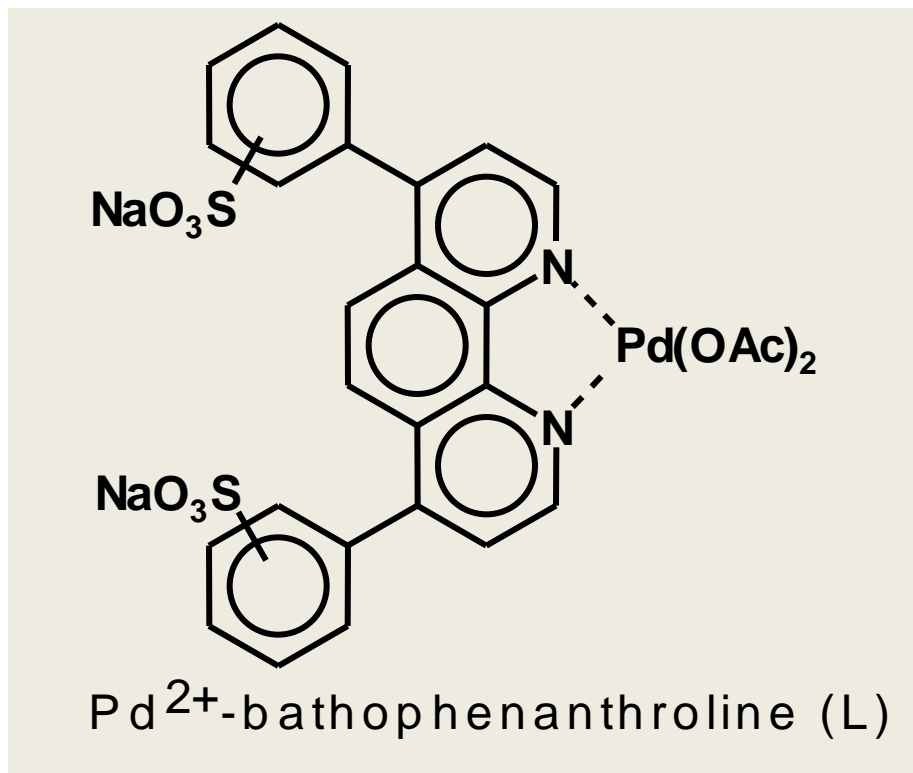

- **Air as oxidant**
- **No organic solvent**
- **Catalyst recycling via phase separation (recycled 4 times without activity loss)**

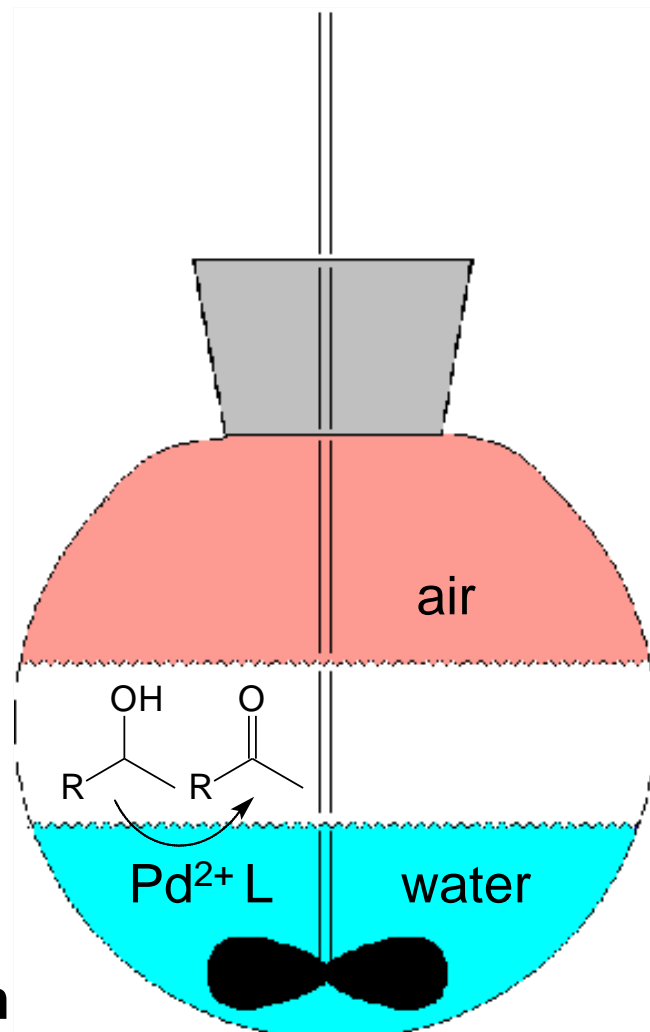

G.J. ten Brink, I.W.C.E. Arends and R.A. Sheldon,  
Science 287 (2000) 1636-9.



## Aerobic Oxidation of Alcohols with Pd(II) – Diamine Catalysts

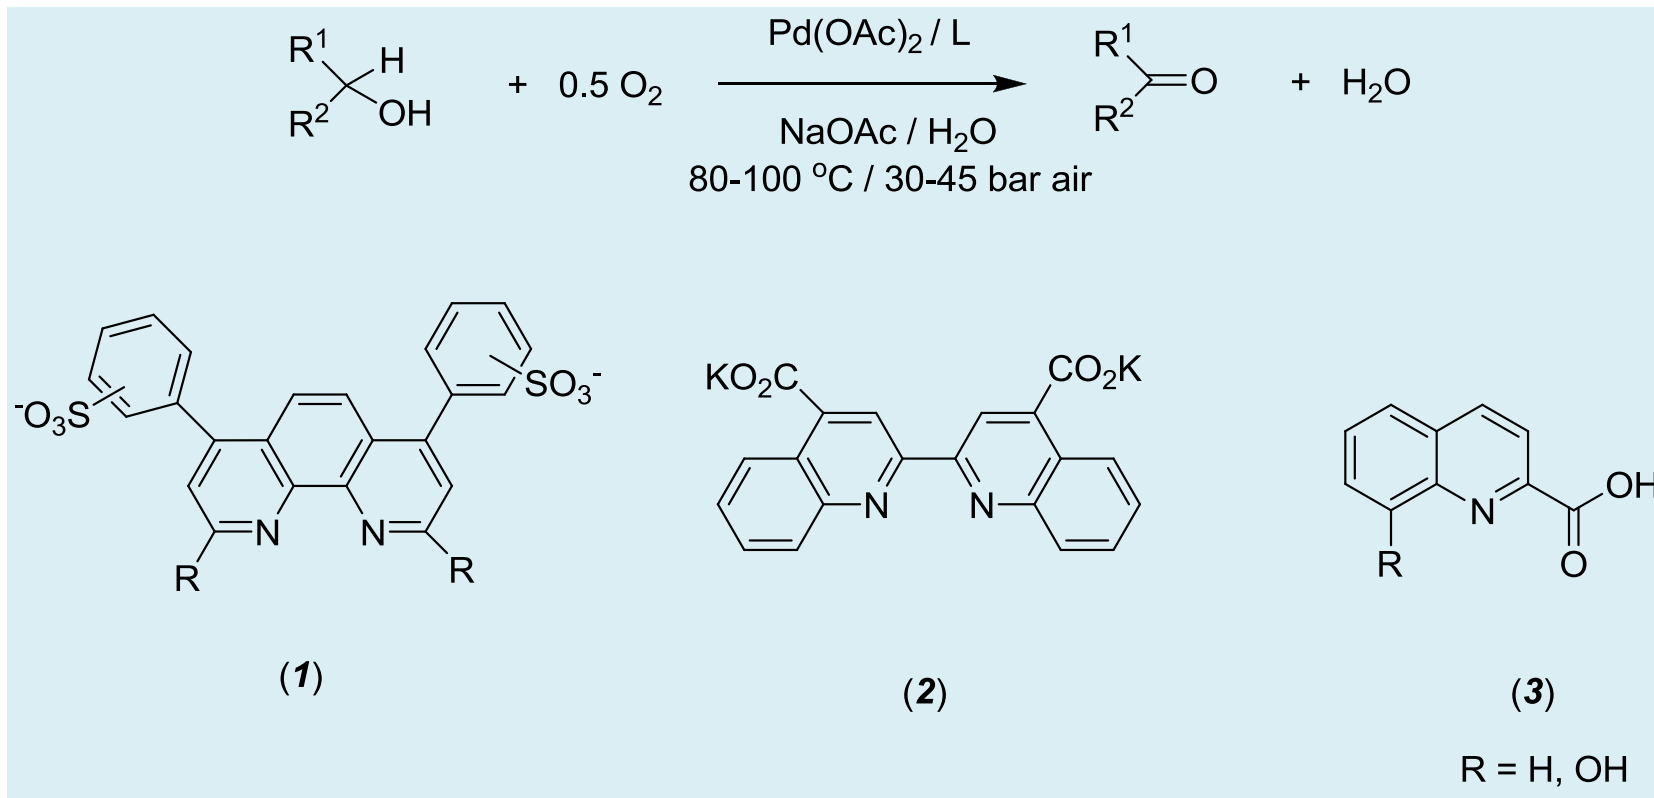

- (1) G.J. ten Brink, I.W.C.E. Arends and R.A. Sheldon, *Science* 287 (2000) 1636  
(2) B. P. Buffin, N. L. Belitz, S. L. Verbeke, *J. Mol. Catal. A: Chemical*, 2008, 284, 149  
(3) D. S. Bailie, G. M. A. Clendenning, L. McNamee and M. J. Muldoon, *Chem. Commun.*, 2010, 46, 7238

# Steric Effects

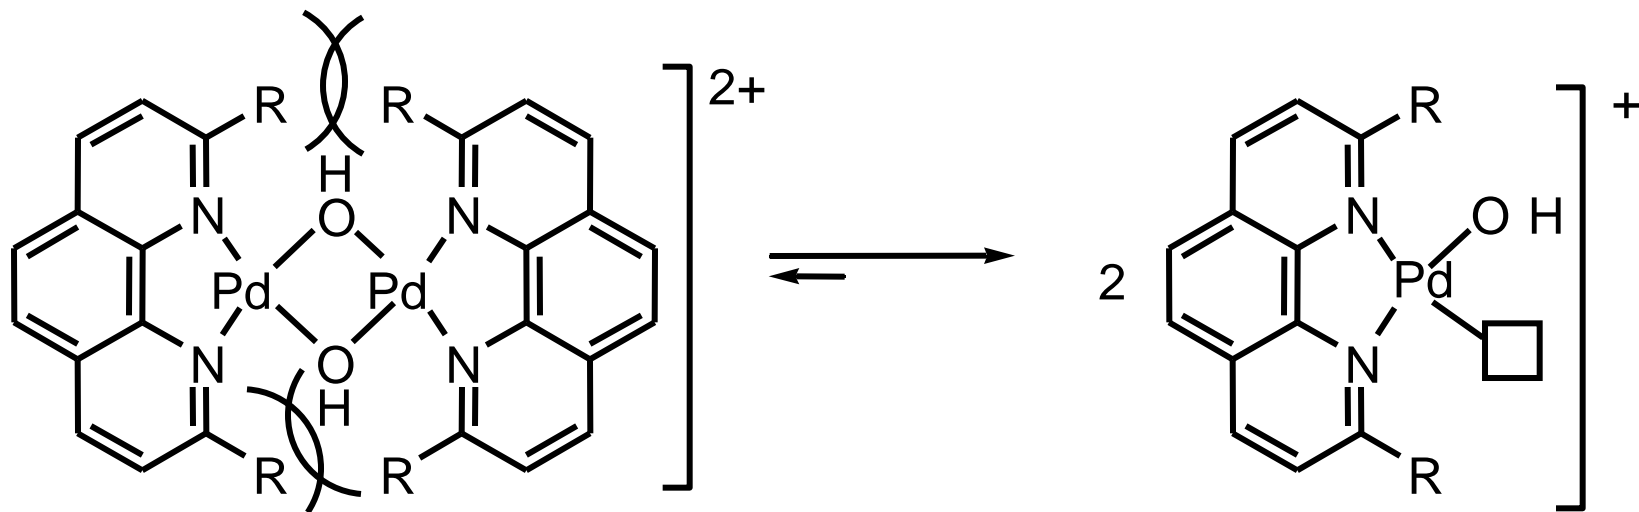

Structure in aq. solution

Active catalyst

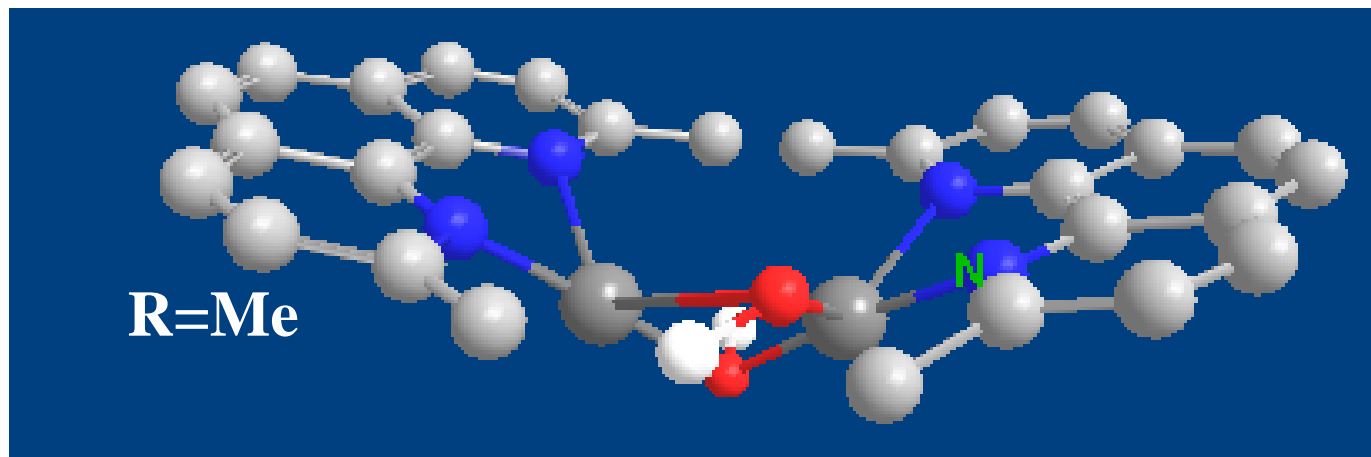

Cup\*Pd(OAc)<sub>2</sub>



# Steric Effects

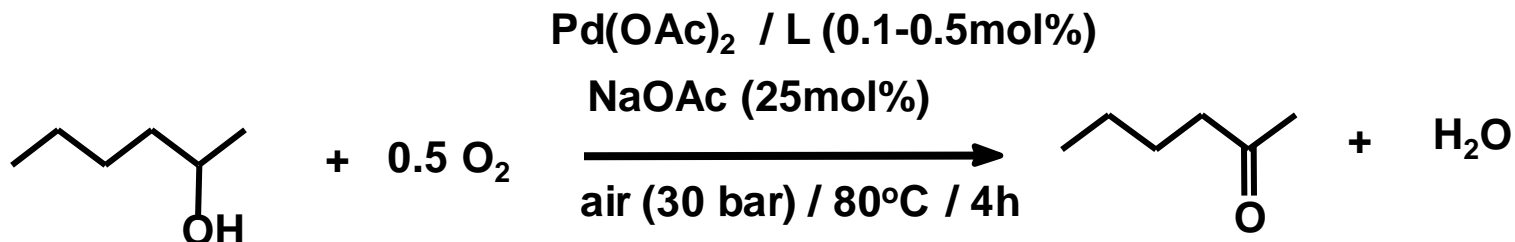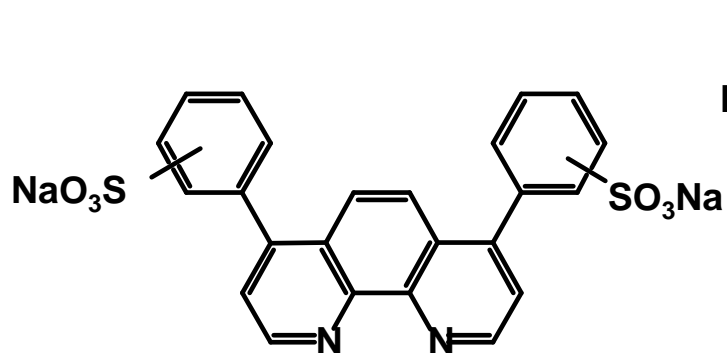

**L**

**PhenS**

TOF (h<sup>-1</sup>)

50

Solvent

H<sub>2</sub>O

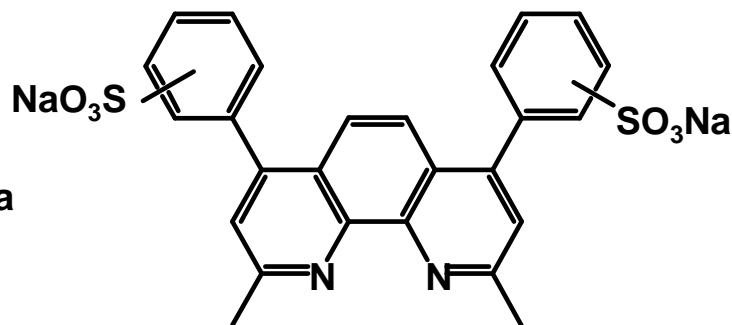

**BathocuproinS**

150

H<sub>2</sub>O

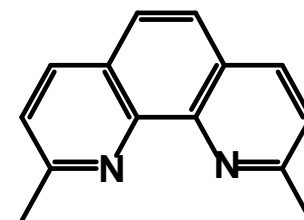

**Cuproin**

1800

H<sub>2</sub>O / DMSO (1:1)

# Cuproin/ $\text{Pd}(\text{OAc})_2$ : Functional Group Tolerance

**C=C**      **C=O**      **acetylene**

**OR**      **SR**       **$\text{SiR}_3$**

**(O)S=O**       **$\text{SO}_3\text{R}$**        **$\text{NR}_2$**

**CN**       **$\text{CONH}_2$**        **$\text{CO}_2\text{R}$**

**Alcohol (0.3M), 0.5m%  $\text{LPd}(\text{OAc})_2$**

**25m %  $\text{NaOAc}$  in  $\text{DMSO}/\text{H}_2\text{O}$**

**$80^\circ\text{C}/30$  bar air, 4h**

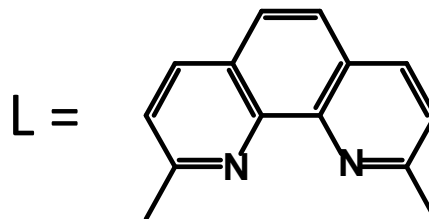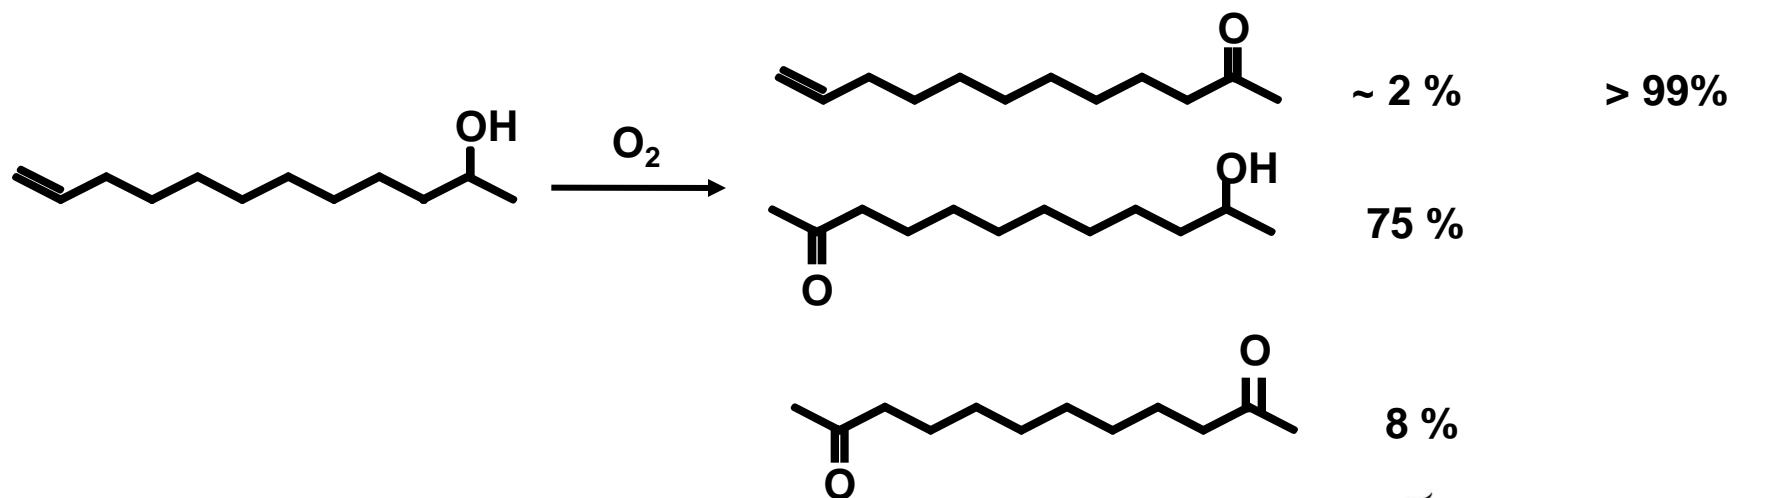

# Pd-nanoparticles

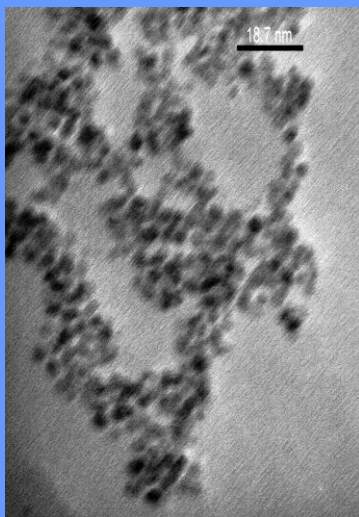

**$\text{Pd}(\text{O}_2\text{CCF}_3)_2/\text{neocuproin} = 1/1$   
ethylene carbonate in  $\text{H}_2\text{O}$**

**Particle size: 5 nm**

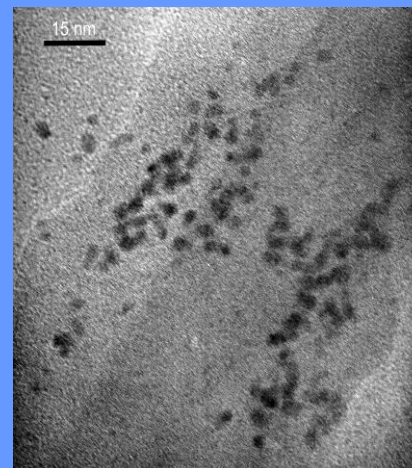

**$\text{Pd}(\text{O}_2\text{CCF}_3)_2/\text{neocuproin} = 1/1$   
PEG3400 in  $\text{H}_2\text{O}$**

**Particle size: 3 nm**

See also I. I. Moiseev et al, *Chem. Commun.* 1985, 937-8

# Pd-Ferritin as an Oxidation Catalyst

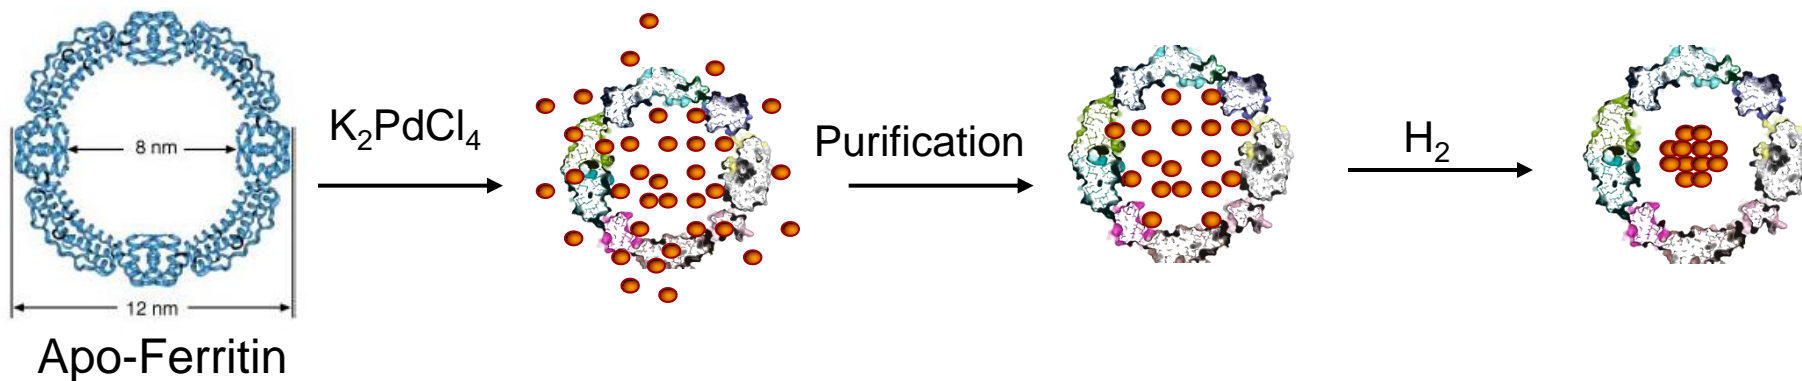

Thermostable Fer from *Pyrococcus furiosus*

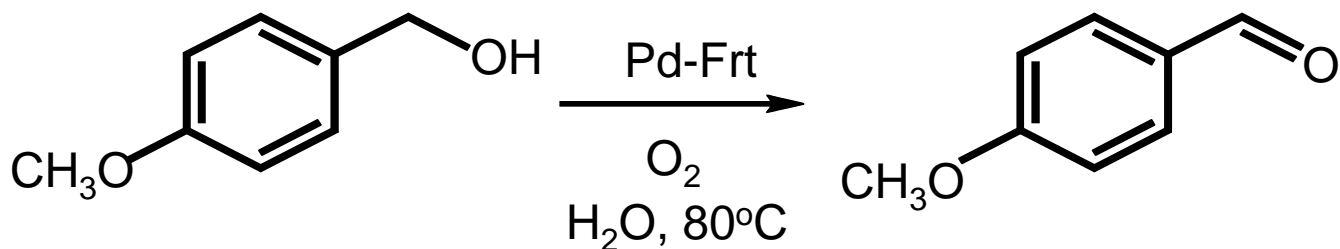

## Chemomimetic biocatalysis

# Catalytic Oxidation of Alcohols in Water with Pd-Ferritin

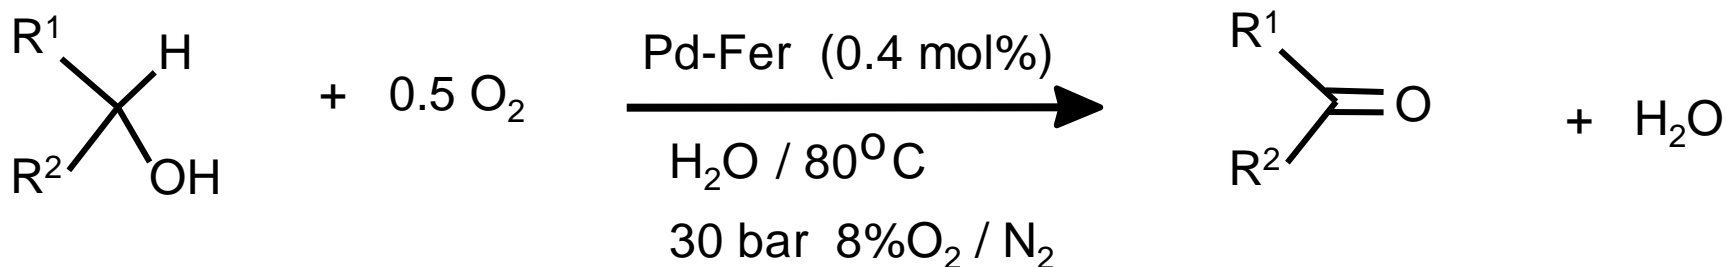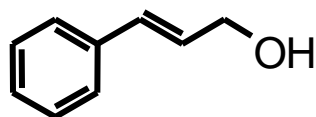

TOF (h<sup>-1</sup>) 197

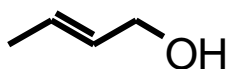

36

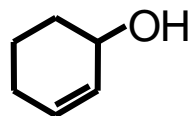

101

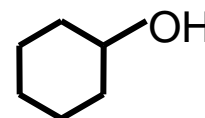

3

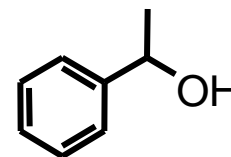

3

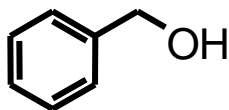

TOF (h<sup>-1</sup>) 37

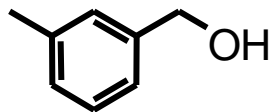

48

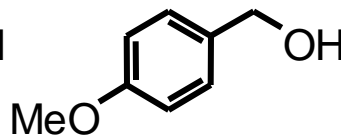

138

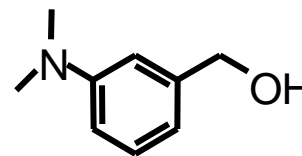

19

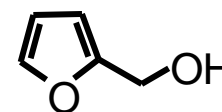

12

N.B. Pd-Fer catalyzes the Suzuki coupling *in aqua*

# Organocatalysis

# Stable Nitroxyl Radicals: Versatile Catalysts for Alcohol Oxidations

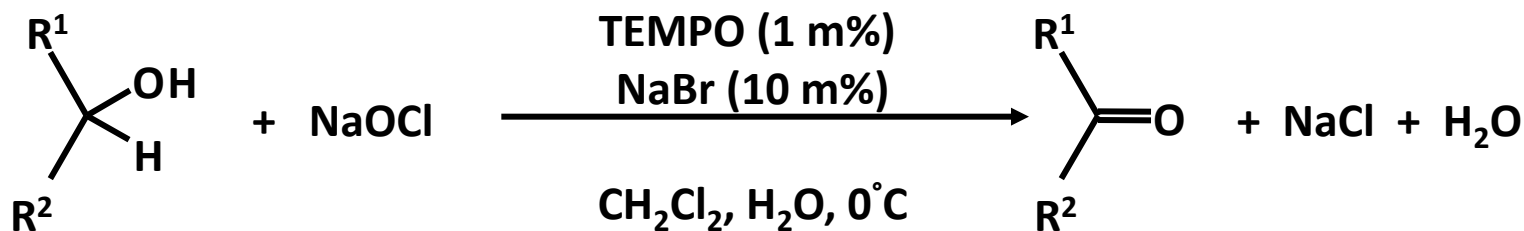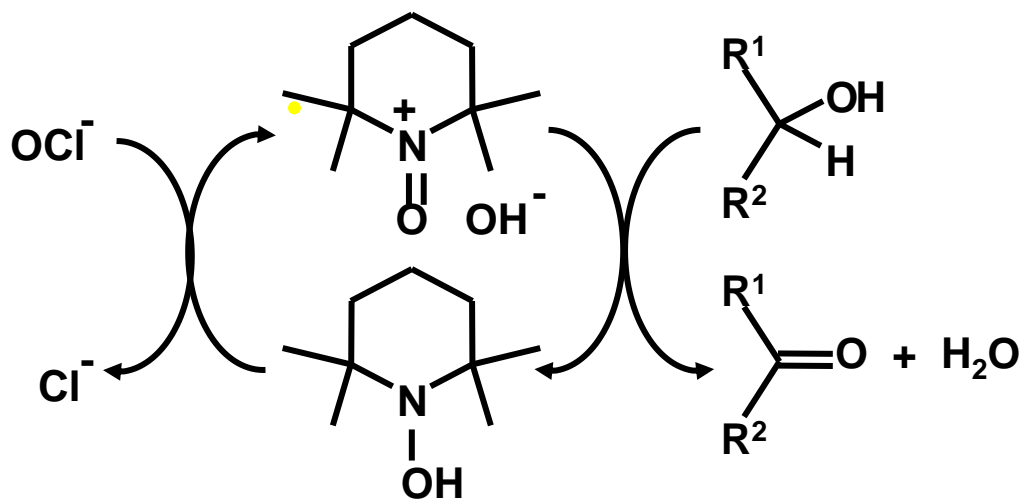

**There are many shades of green!**

# Dioxygen (Air) as Oxidant

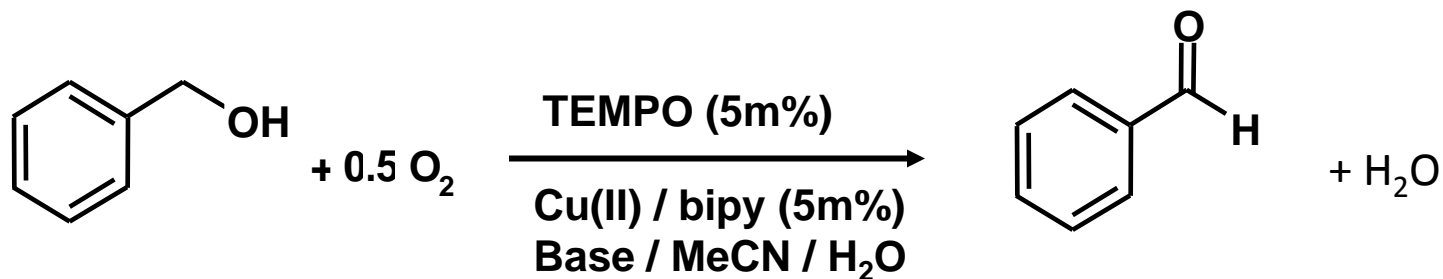

Highly selective for 1<sup>e</sup> alcohols

**Laccase : a blue enzyme for green chemistry**

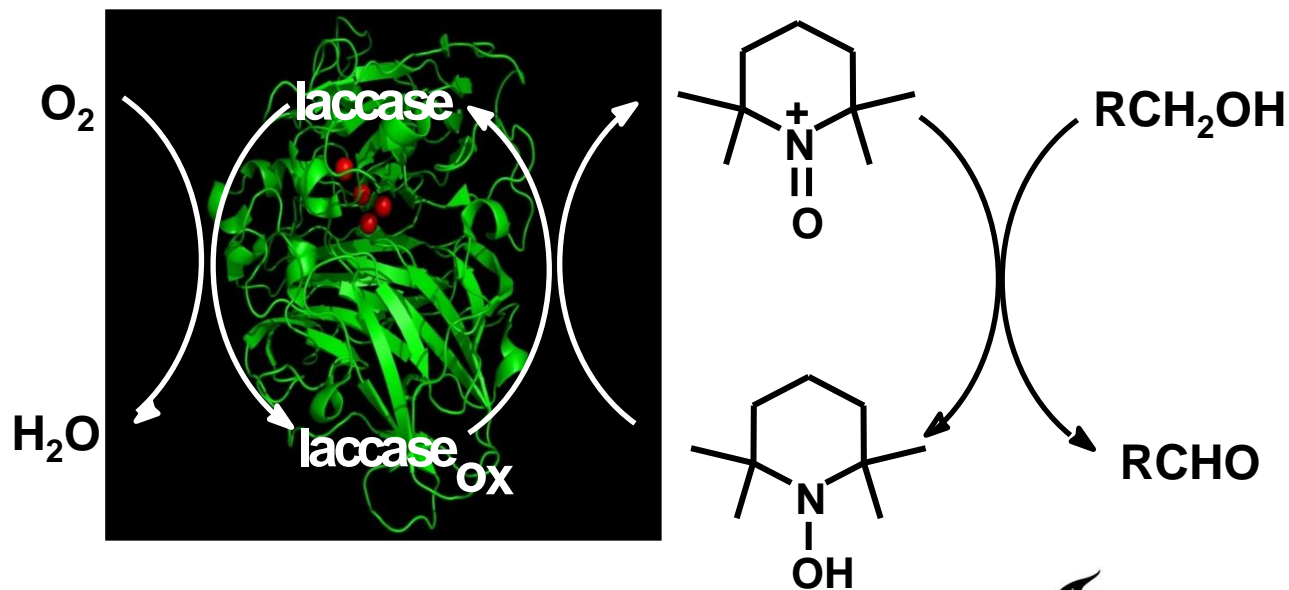



# Oxidation of Benzylic Alcohols

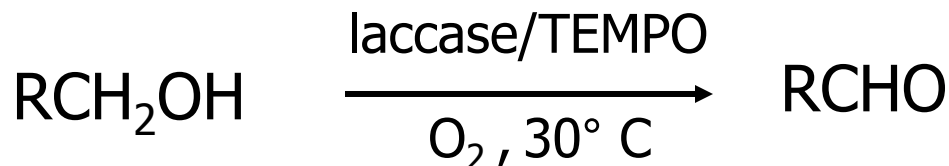

| Substrate                         | Product                          | Conversion % |
|-----------------------------------|----------------------------------|--------------|
|                                   |                                  | after 4 hour |
| <b>3-Methoxybenzyl alcohol</b>    | <b>3-Methoxybenzaldehyde</b>     | <b>100</b>   |
| <b>Veratryl alcohol</b>           | <b>3,4-Dimethoxybenzaldehyde</b> | <b>100</b>   |
| <b>4-Methoxybenzyl alcohol</b>    | <b>4-Methoxybenzaldehyde</b>     | <b>98</b>    |
| <b>3-Phenyl-2-propene-1-ol</b>    | <b>Cinnamaldehyde</b>            | <b>72</b>    |
| <b>3-(Hydroxymethyl) pyridine</b> | <b>Nicotinaldehyde</b>           | <b>98</b>    |
| <b>Benzyl alcohol</b>             | <b>Benzaldehyde</b>              | <b>90</b>    |

1.6 mmol substrate, Lacc/Subs: 62.5 U/mmol,  
TEMPO (9.4 mol%), 0.1 M phosphate buffer (pH 4)

# A Green Product: Carboxystarch

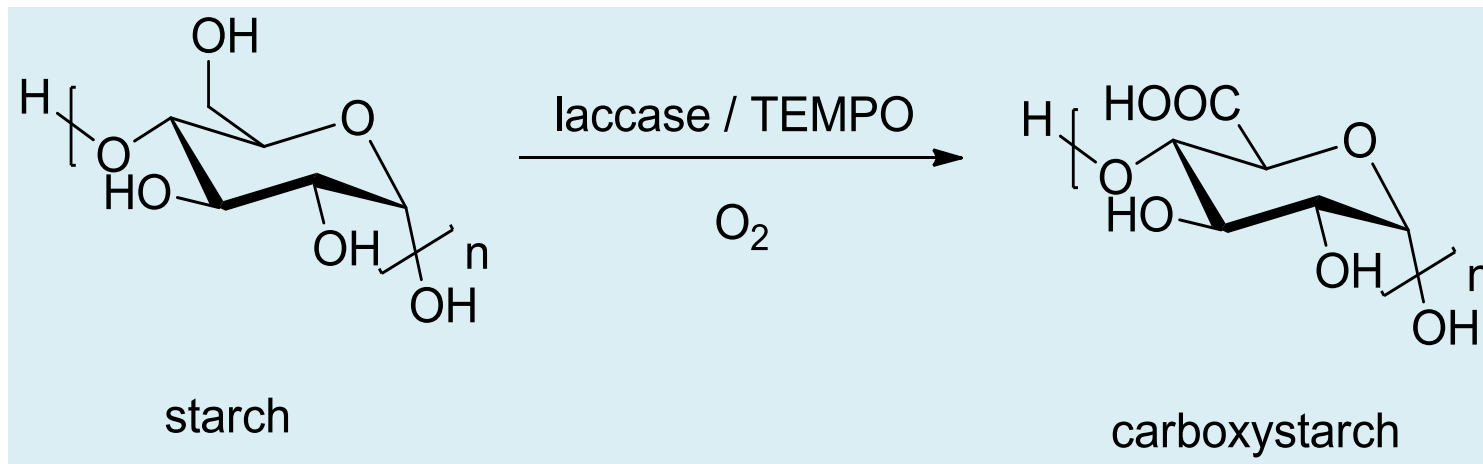

- A biodegradable water super absorbent
- To replace poorly biodegradable polyacrylates
- Laccase immobilized as a CLEA for improved performance

# Efficiency in C-C Bond Formation: Carbonylation

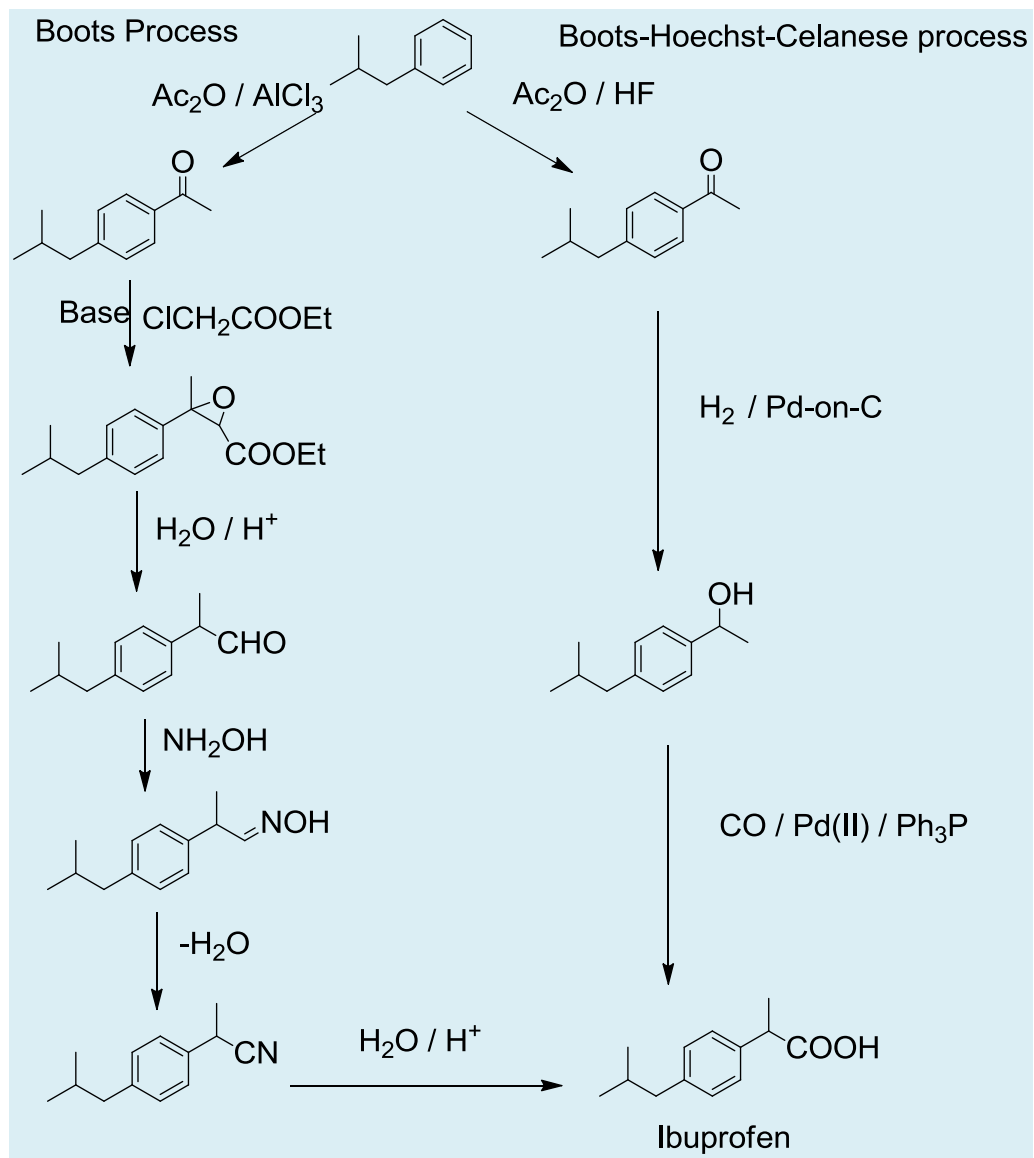

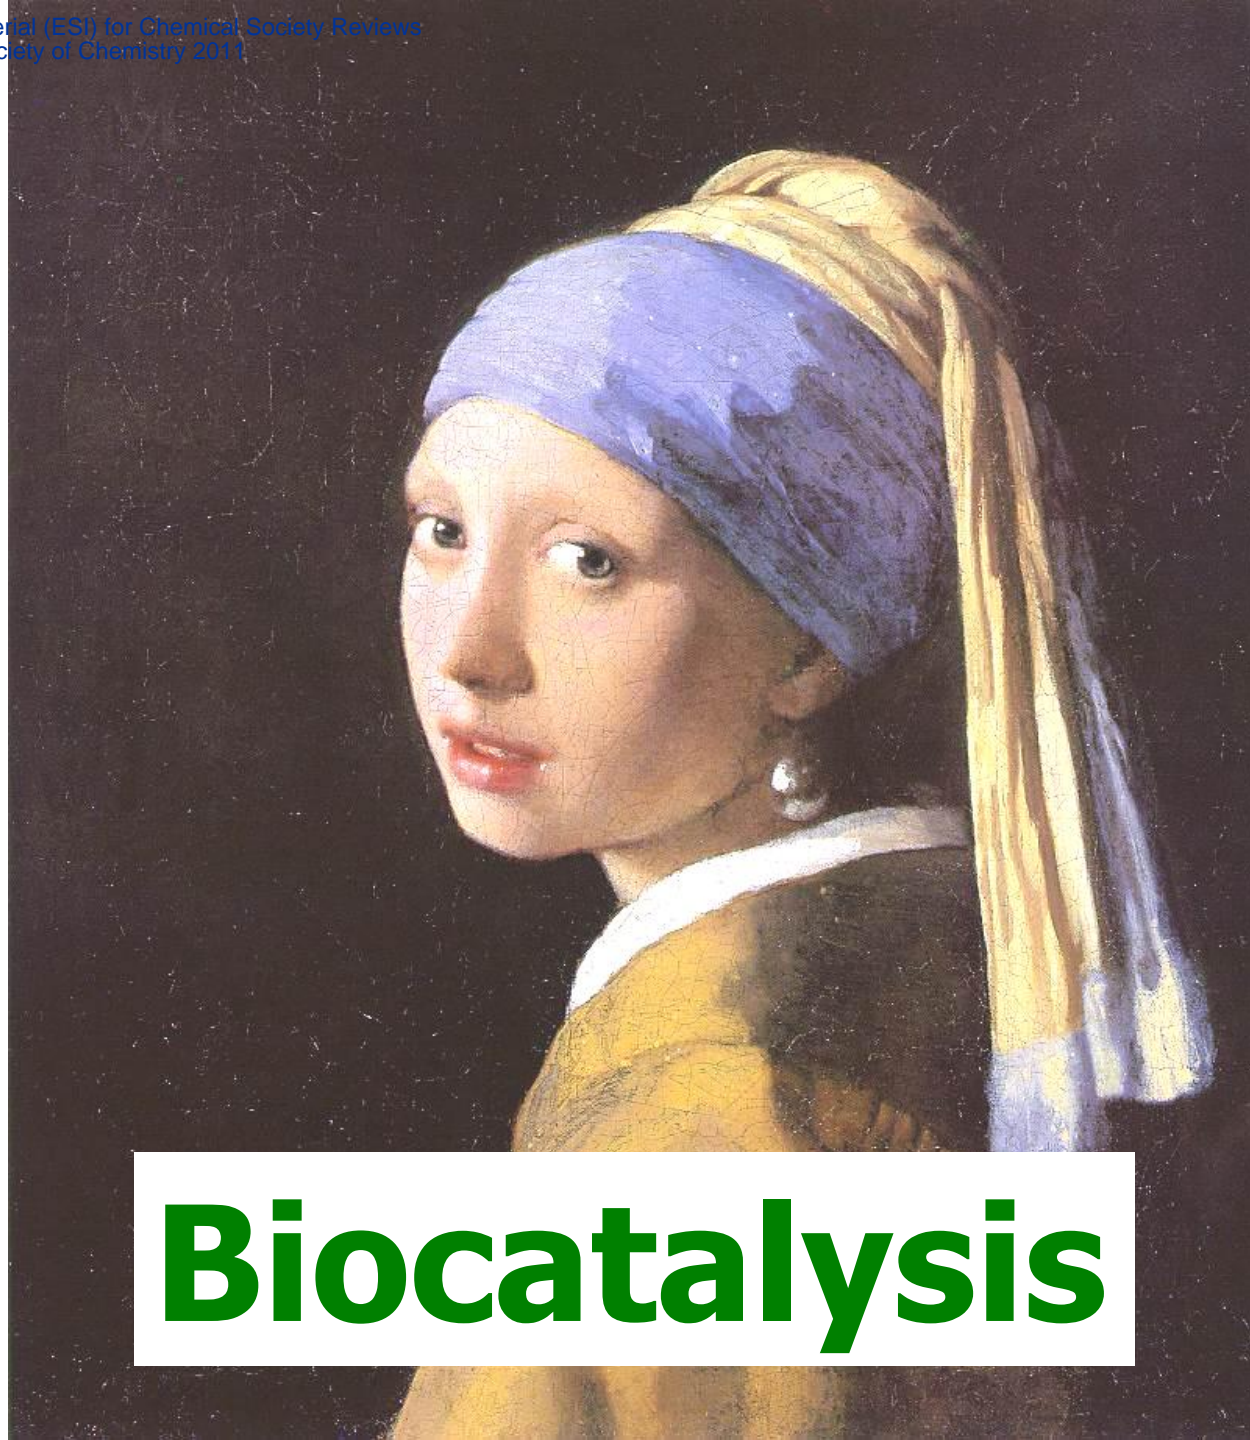

# Biocatalysis

# Biocatalysis is Green & Sustainable

- **Enzymes are derived from renewable resources and are biodegradable**
- **Avoids use of (and product contamination by) scarce precious metals**
- Mild conditions: ambient T & P in water
- High rates & highly specific : substrate, chemo-, regio-, and enantiospecific
- Higher quality product
- No special equipment needed

# Biocatalysis : why now ?

1. **Genome sequencing (> 5000)**  
(more enzymes)
2. **Directed evolution technologies**  
(better enzymes)
3. **Immobilization technologies**  
(better formulation)
4. **Green & Sustainable**  
(small environmental footprint)

# Two Types of Biotransformations

- Free enzymes
  - isolated (purified)
  - whole cells (not growing)
  - can be very high STY
- Fermentations (growing microbial cells)
  - less expensive (no enzyme isolation needed)
  - often dilute solution / low STY
  - water footprint /energy intensive
  - byproducts from enzyme impurities

# E Factors of Fermentations

| Product      | E Factor | E factor (incl. water) |
|--------------|----------|------------------------|
| Citric acid  | 1.4      | 17                     |
| Bioethanol   | 1.1      | 42 <sup>a</sup>        |
| Rec. insulin | 6600     | 50,000                 |

<sup>a</sup> Includes water and carbon dioxide



# Asymmetric Ketone Reduction

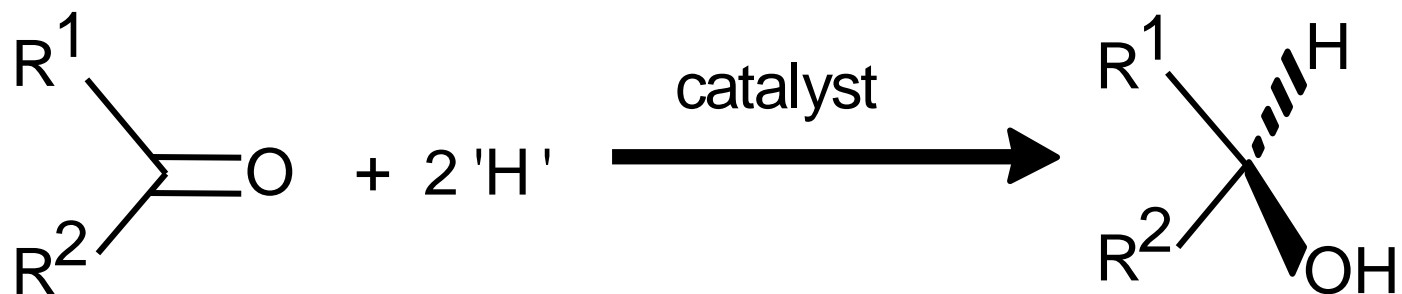

# Production of Lipitor Intermediates

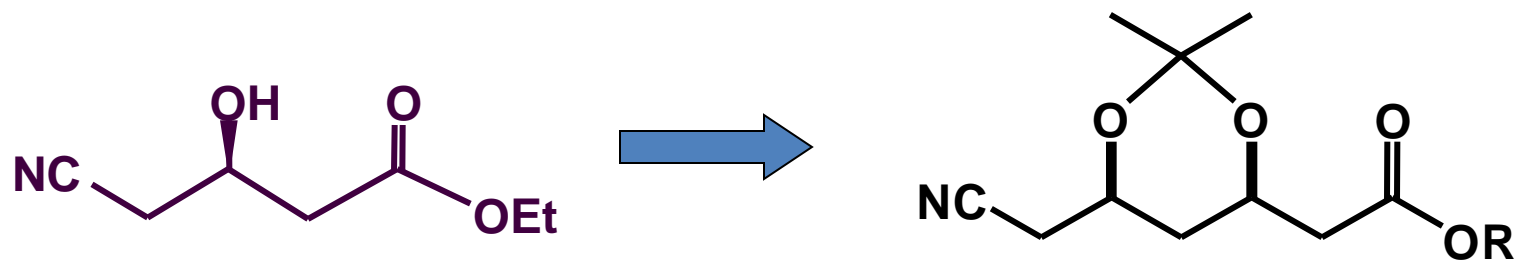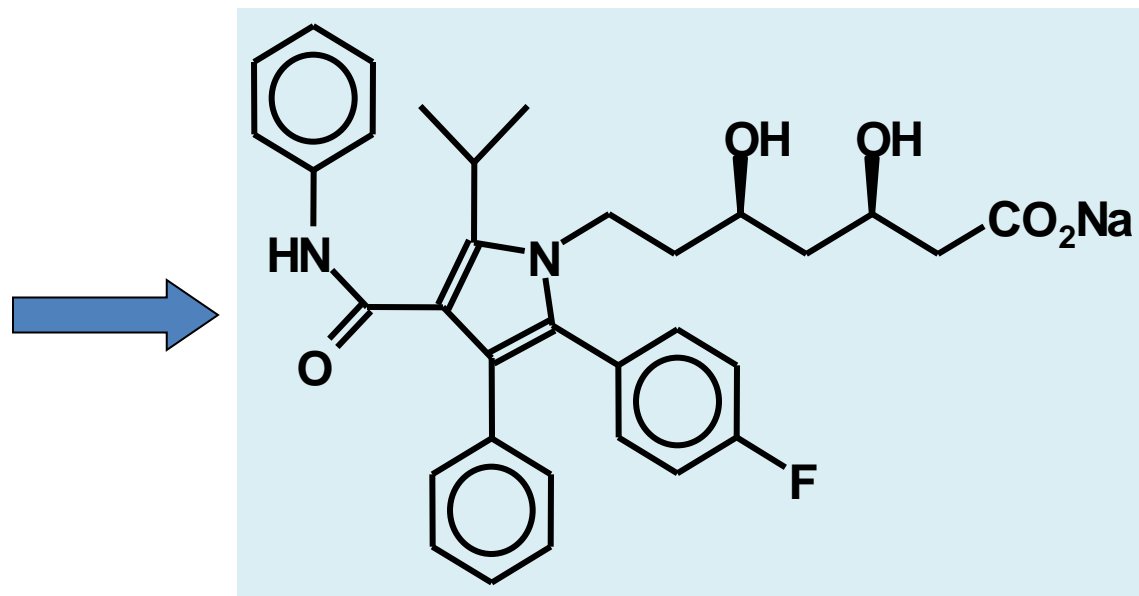

Lipitor (Pfizer)  
Sales in 2009: \$14 bio

# Existing Processes for Hydroxynitrile

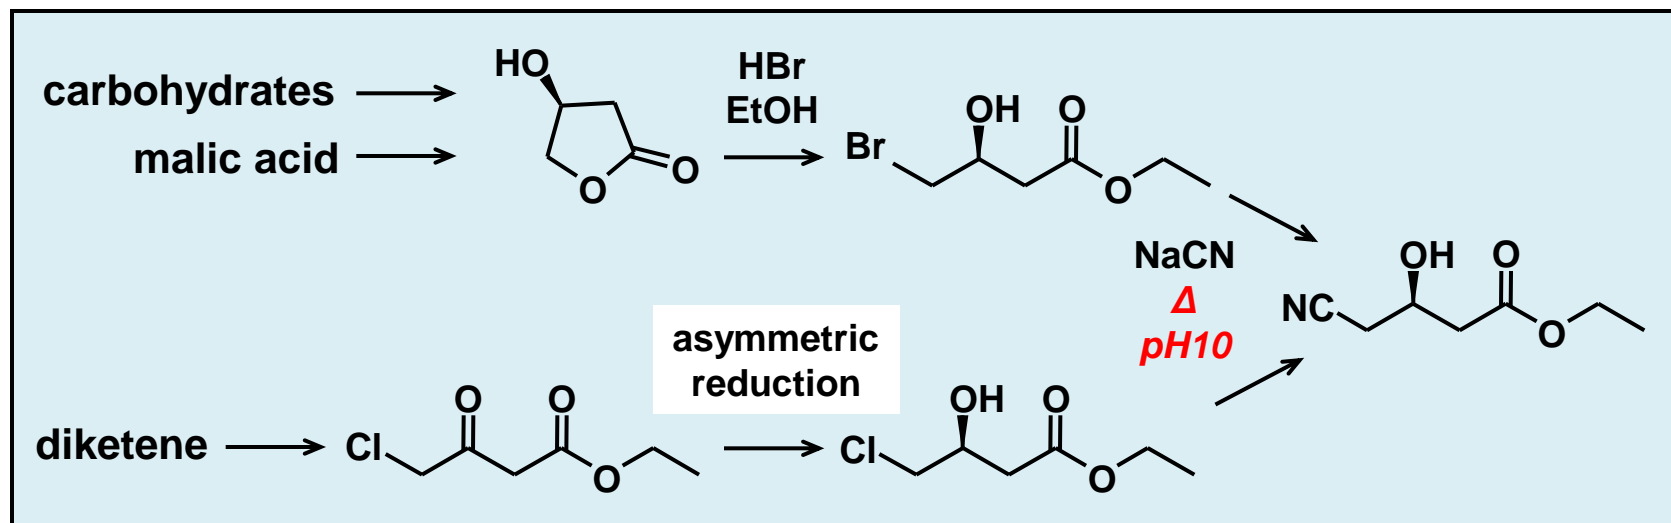

- Forcing conditions for cyanation result in base-catalyzed side reactions,
- Purification requires problematic, high vacuum fractional distillation.

→ ***Understanding the problem is key (chem. and opt. purity >99%)***

→ ***Cyanation at neutral pH and RT (with an enzyme)***

# Enzymatic Synthesis of Lipitor Intermediate

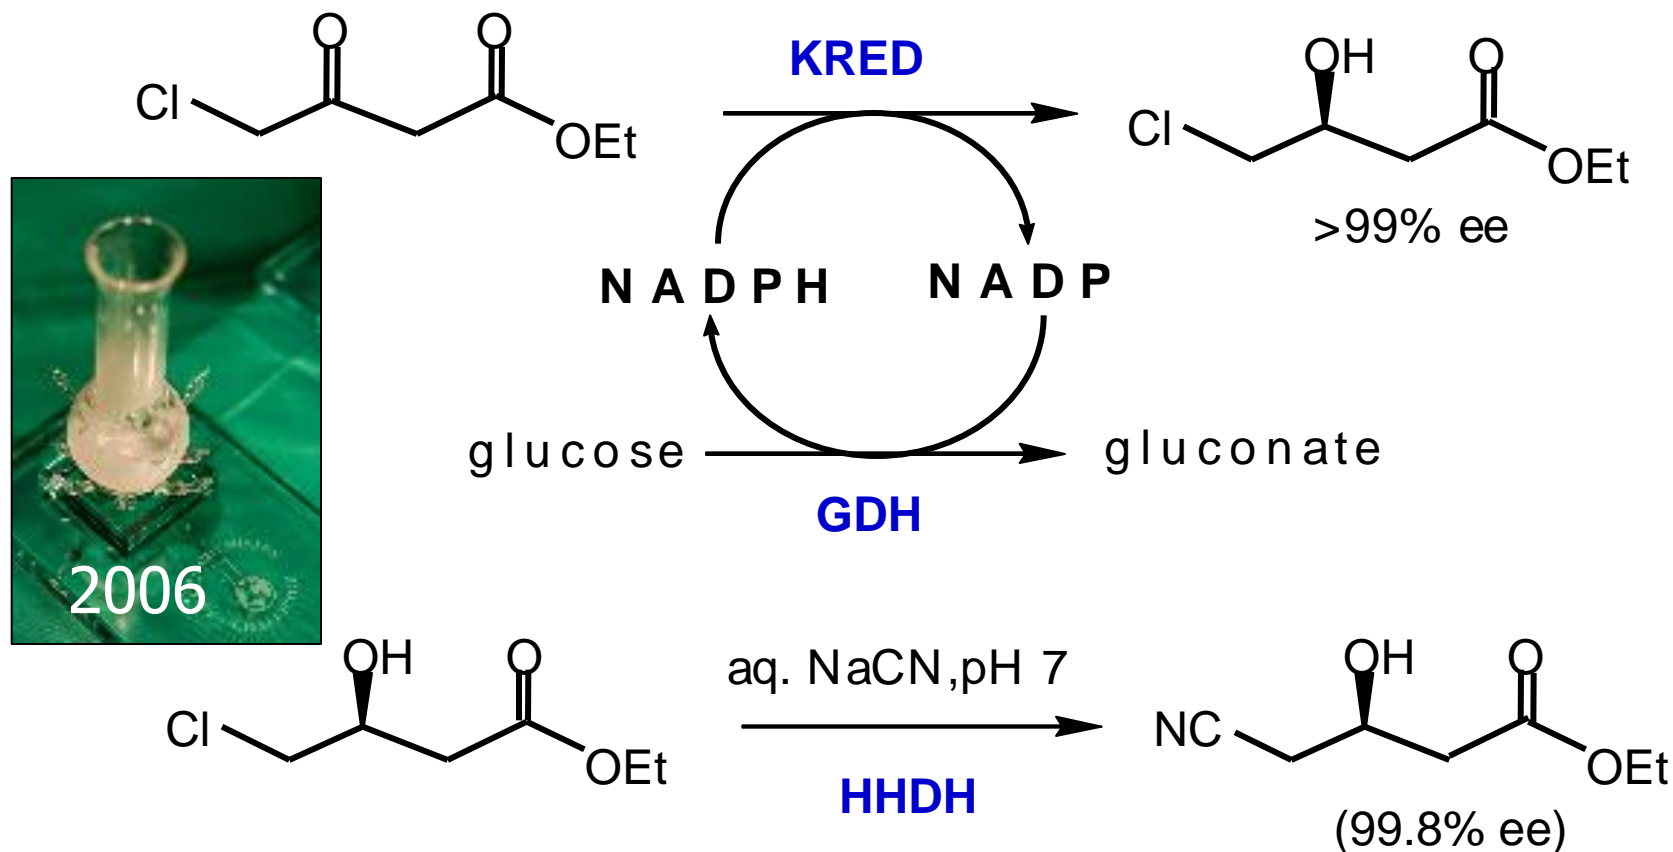

KRED = keto reductase ; GDH = glucose dehydrogenase  
HHDH = halohydrin dehalogenase (**non-natural nucleophile**)

R.J.Fox, S.C.Davis, R.A.Sheldon, G.W.Huisman, et al  
Nature Biotechnology, 25 (2007) 338-344

# Directed Evolution for Improved Performance

## Features of the Wild-Type Enzymes:

- **high enantioselectivity**
- **mild (ambient) conditions**
- **no metal catalysts required**
- **no need for dedicated equipment**
- **low productivities**

**Productivities of all three enzymes improved by directed evolution using gene shuffling technology**

W.P.C.Stemmer,Nature,370,389-391,1994

# Gene Shuffling : Evolution in the Fast Lane

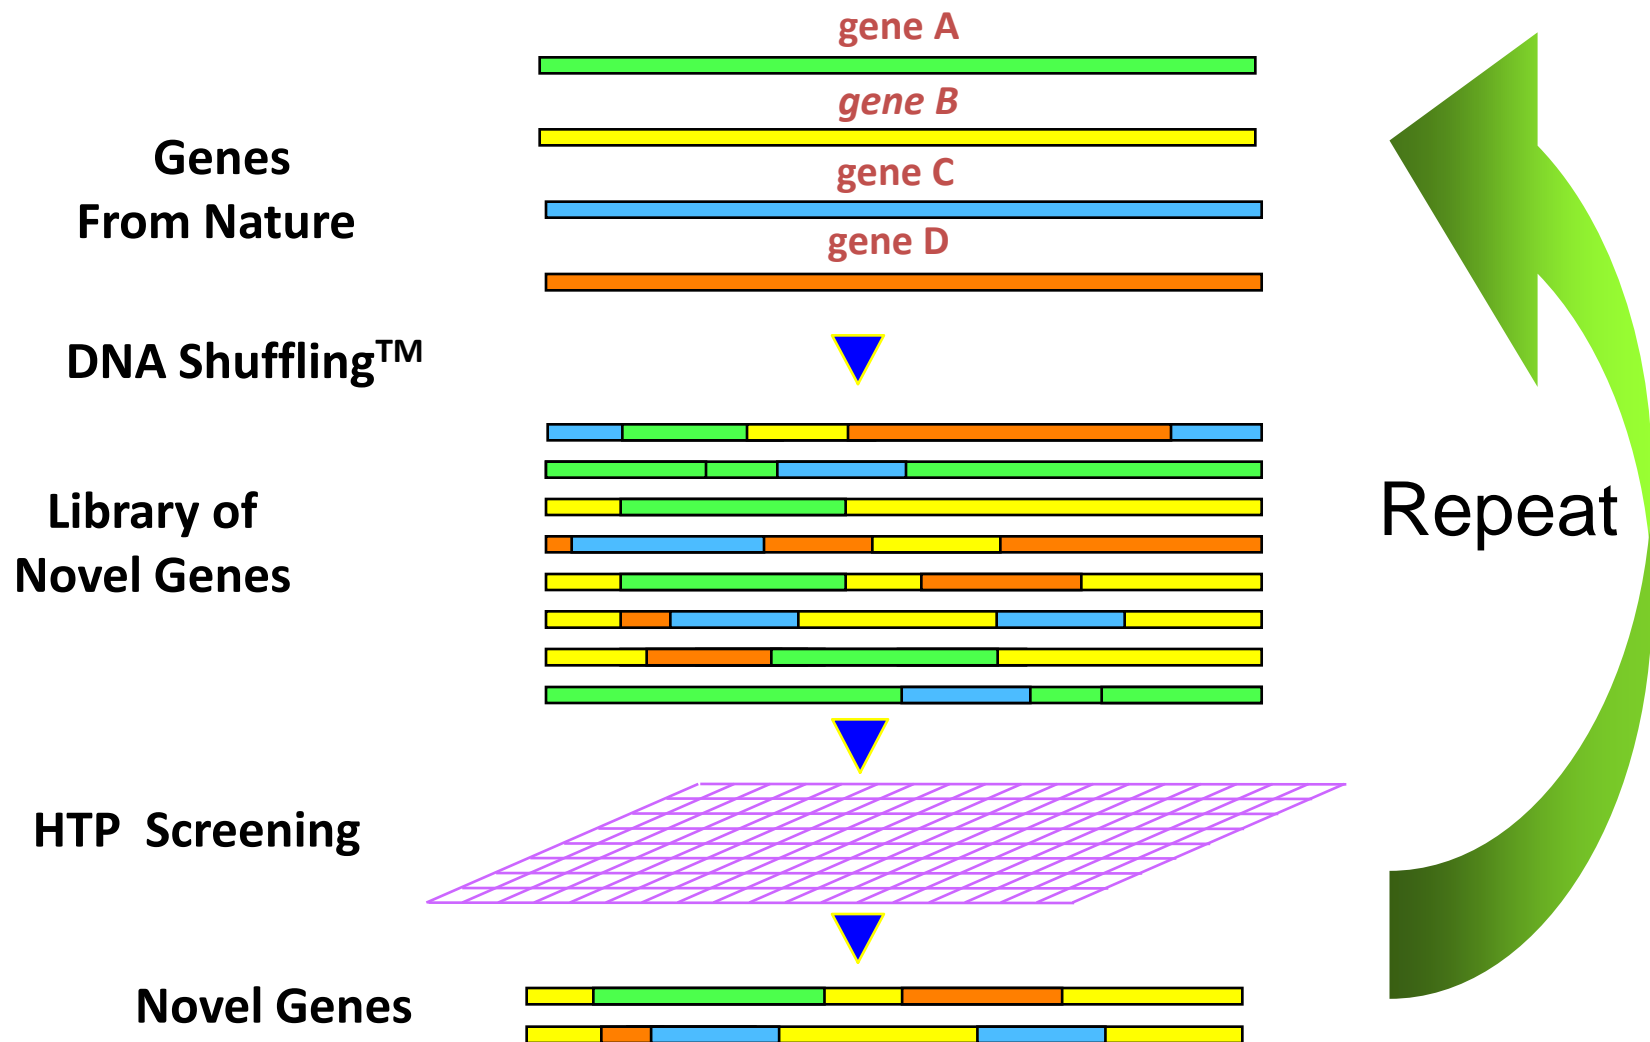

W.P.C. Stemmer, Nature, 370, 389-391, 1994

# E factor of the Codexis Three-Enzyme Process

## Presidential Green Chemistry Challenge Award 2006

| Waste                                        | Quantity<br>( kg per kg HN) | % contribution to E<br>(excluding water) | % contribution to E<br>(including water) |
|----------------------------------------------|-----------------------------|------------------------------------------|------------------------------------------|
| ECAA losses (8%)                             | 0.08                        | <2%                                      | <1%                                      |
| Triethanolamine                              | 0.04                        | <1%                                      | <1%                                      |
| <b>NaCl and Na<sub>2</sub>SO<sub>4</sub></b> | 1.29                        | <b>22%</b>                               | ca. 7%                                   |
| <b>Na-Gluconate</b>                          | 1.43                        | <b>ca. 25%</b>                           | ca. 9%                                   |
| <b>BuOAc<br/>(85%recycle)</b>                | 0.46                        | <b>ca. 8%</b>                            | ca. .3%                                  |
| <b>EtOAc<br/>(85%recycle)</b>                | 2.50                        | <b>ca. 43%</b>                           | ca. 14%                                  |
| <b>Enzymes</b>                               | 0.023                       | <b>&lt;1%</b>                            | <1%                                      |
| <b>NADP</b>                                  | 0.005                       | <b>0.1%</b>                              | <0.1%                                    |
| Water                                        | 12.25                       | -                                        | 67%                                      |
| <b>E Factor</b>                              | <b>5.8 (18)</b>             |                                          |                                          |

R. A. Sheldon, G. Huisman et al, Green Chem. 2010, 12, 81-86

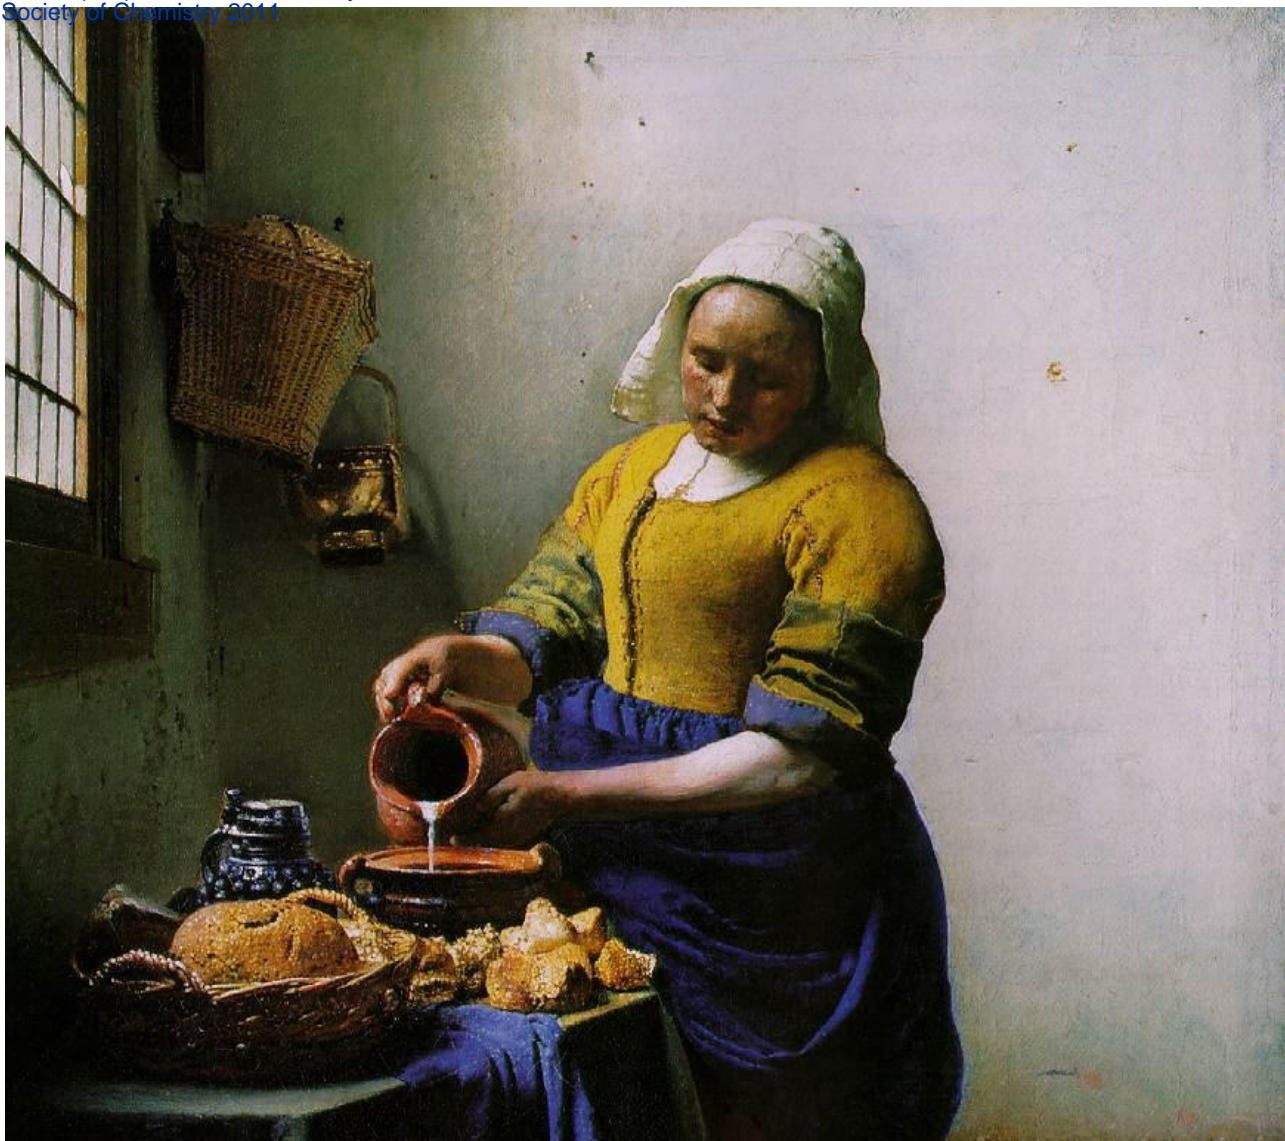

# Biocatalyst Engineering



# Multistep Syntheses: Nature's Way

## The Cell Factory:

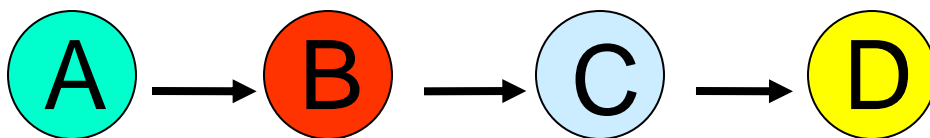

**Cascade approach in metabolic pathways  
by enzymatic catalysis in water without  
isolation of intermediates**

**Step economy**

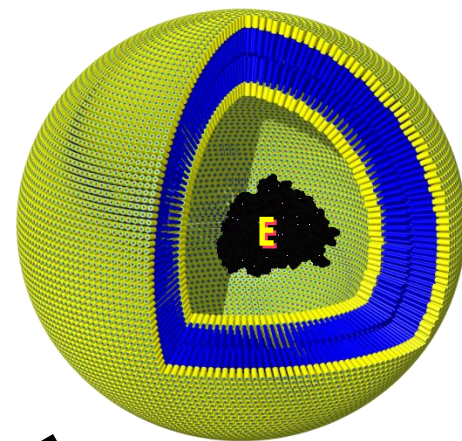

**Compartmentalisation for compatibility**

# Limitations of Enzymes

- **Low operational stability & shelf-life**
- **Cumbersome recovery & re-use**
- **Product contamination**
- **Allergic reactions of proteins**

**The solution: immobilization  
an enabling technology**

# Heterogeneous Catalysis with Cross-Linked Enzyme Aggregates

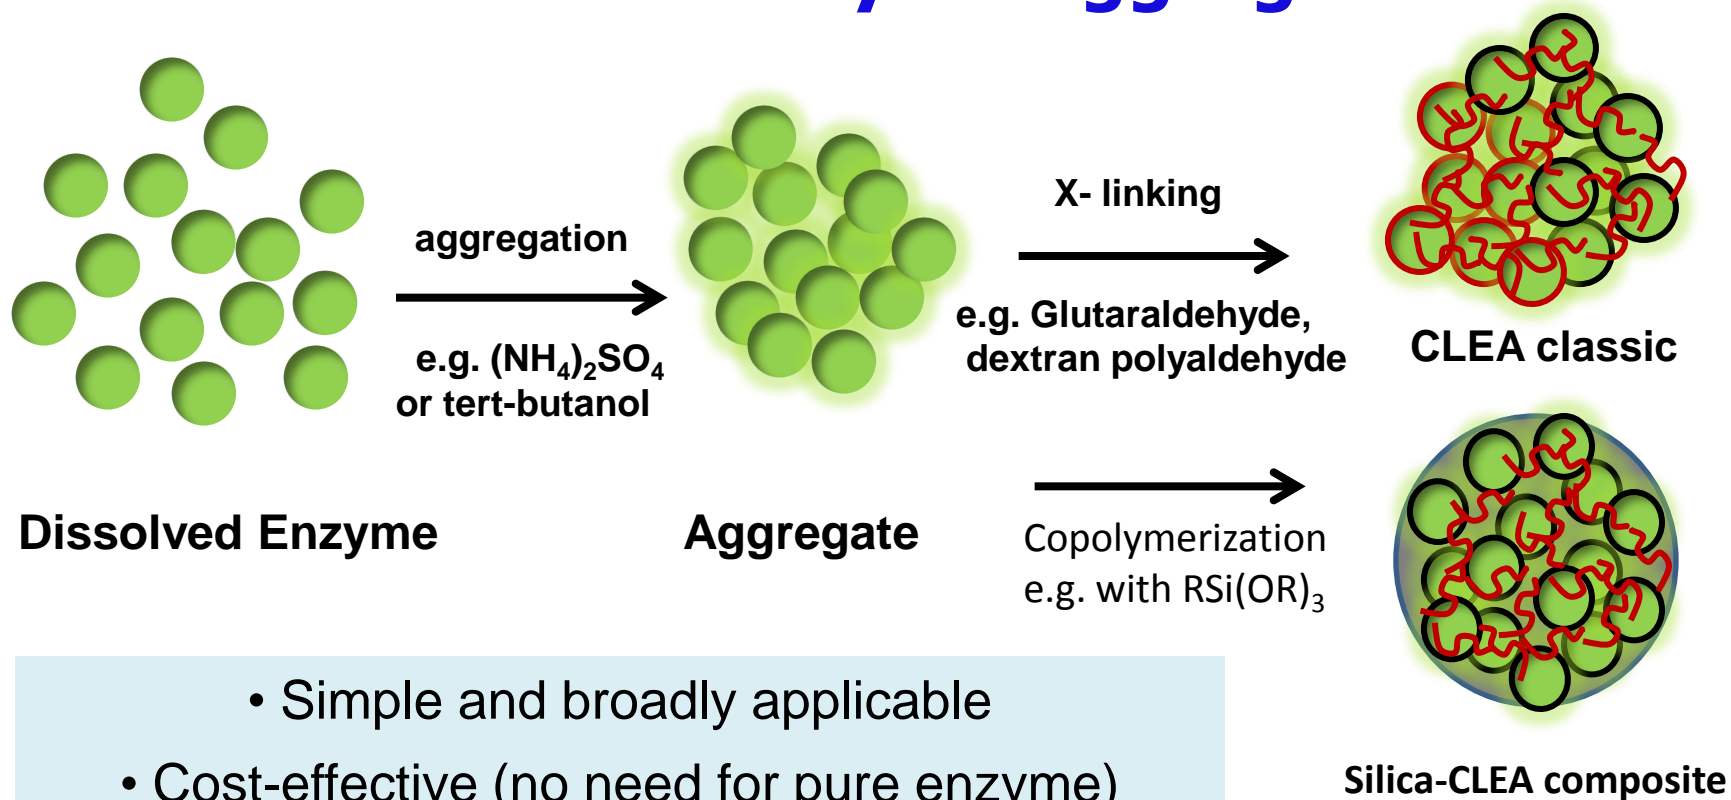

- Simple and broadly applicable
- Cost-effective (no need for pure enzyme)
- Short time-to-market (low development costs)
- Scalable protocols

# Advantages of CLEAs

## 1. Improved properties

- better storage and operational stability
- (to heat, organic solvents and autolysis)
- hypoallergenic
- no leaching of enzyme in aqueous media

## 2. Cost-effective

- no need for highly pure enzyme (crude enzyme extract sufficient)
- easy recovery and recycle (no product contamination)
- high activity recovery and productivity (kg product/kg enzyme)

## 3. Broad scope & short time to market

- combi CLEAs containing more than one enzyme

# Step Economy a Tri-enzymatic Cascade with a Triple-Decker CLEA

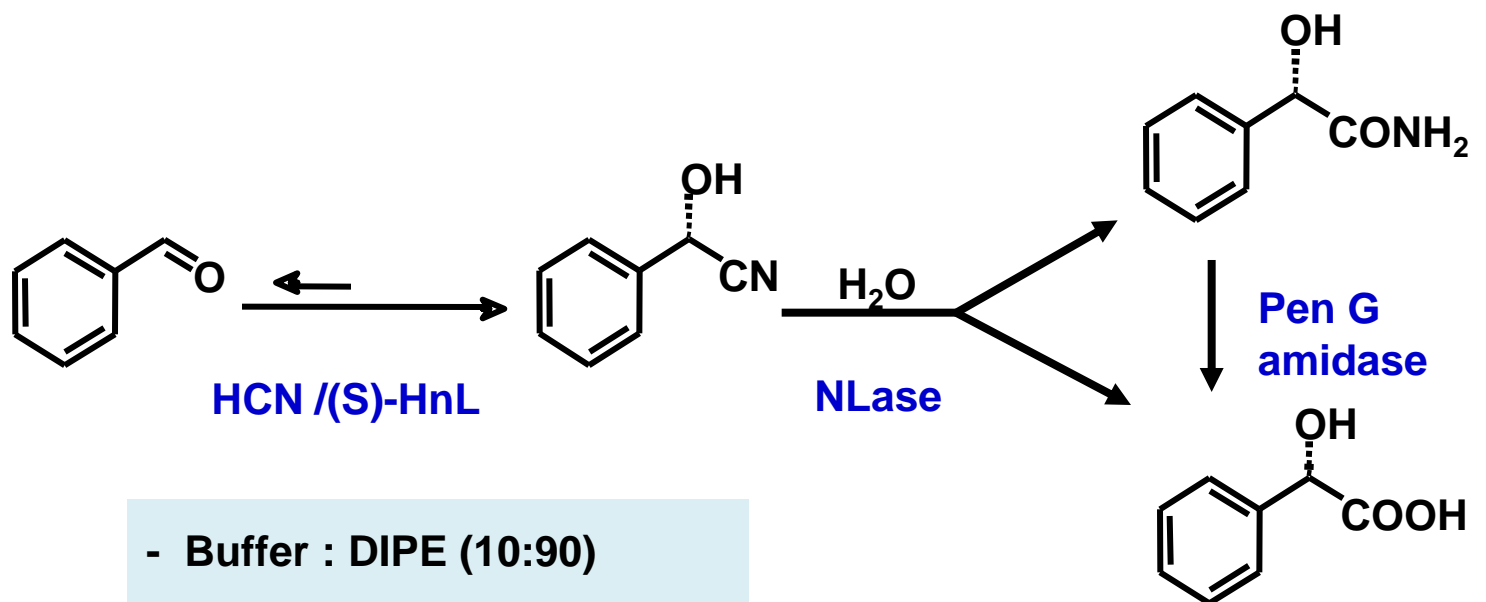

- Buffer : DIPE (10:90)
- pH 5.5 / RT / < 5h
- HnL/ NLase / Pen.acylase  
combi-CLEA

Conv. 96% / ee >99%

# Catalytic Conversion of Renewable Raw Materials

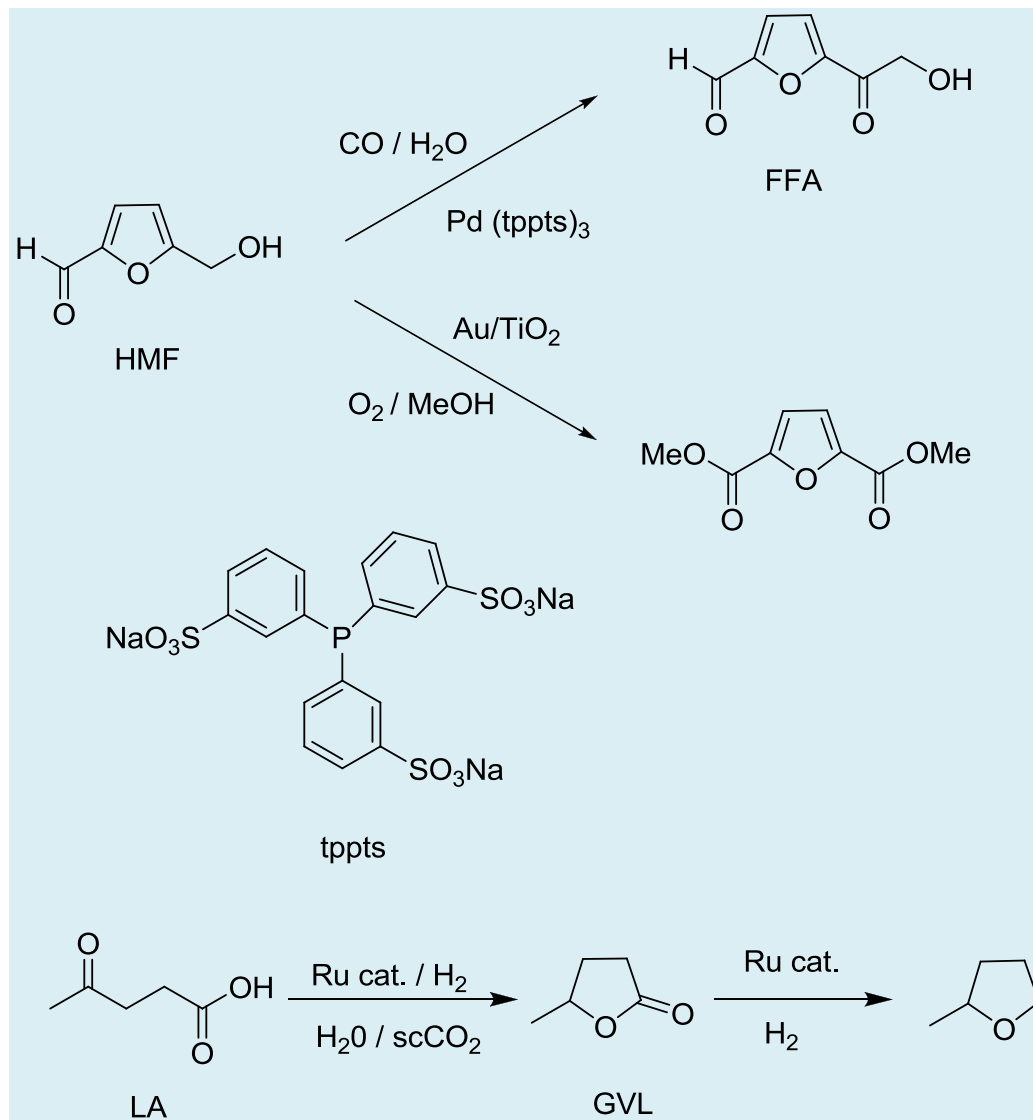

# Take Home Message

Green chemistry & (bio)catalysis  
merge science and technology with  
environment and economics on the  
road to a sustainable society.

Green chemistry is not only  
good for the environment it  
is good for business.



# Think Green

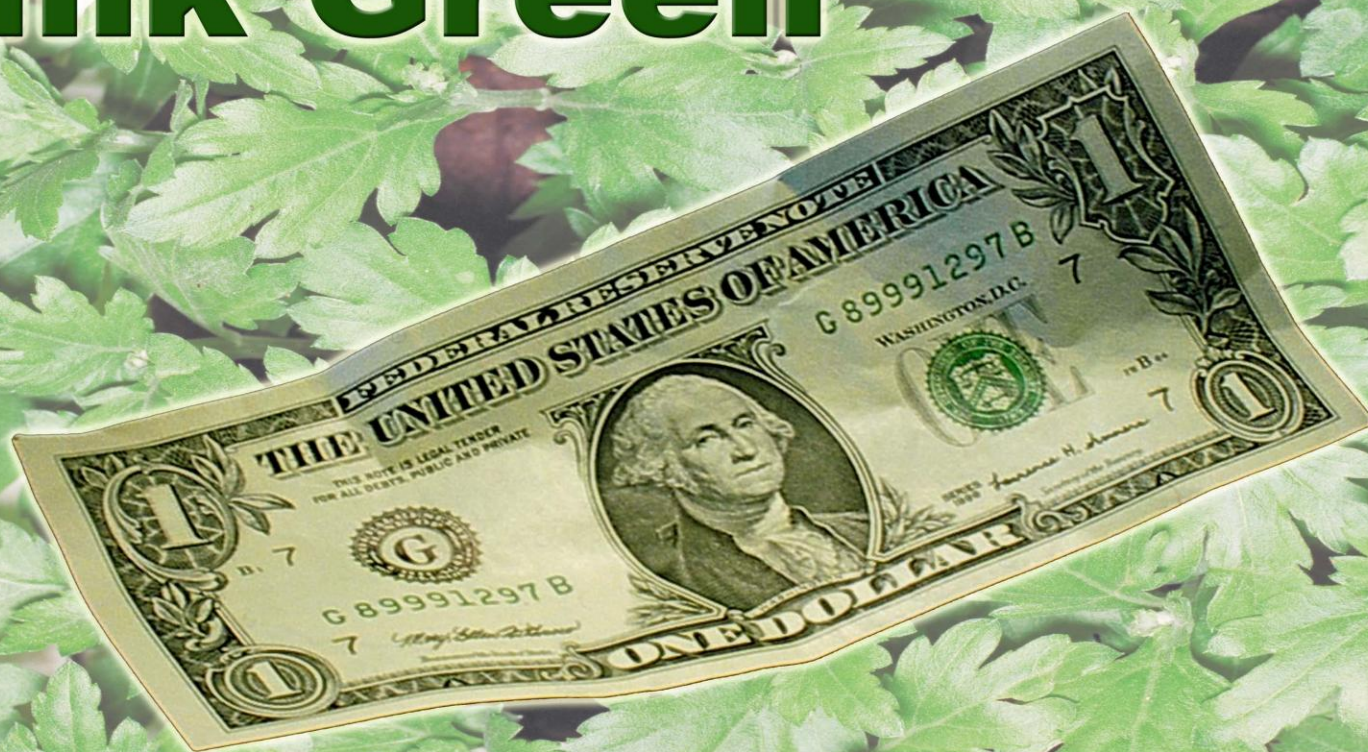

# and Sustainable
